1 **Title: Syncytiotrophoblast extracellular vesicles contain functional kynurenine**  
2 **metabolising enzymes: potential implications for preeclampsia.**

3  
4 Prassana Logenthiran<sup>1,2</sup>, Toluwalase Awoyemi<sup>1</sup>, Morganne Wilbourne<sup>1</sup>, Zhanru Yu<sup>3</sup>,  
5 Benedikt Kessler<sup>3</sup>, Carlos Escudero<sup>1,4</sup>, Wei Zhang<sup>1</sup>, Sofia Cerdeira<sup>1</sup>, Manu Vatish<sup>1\*</sup>

6  
7 <sup>1</sup> Nuffield Department of Women's & Reproductive Health, University of Oxford, Women's  
8 Centre, John Radcliffe Hospital, Oxford OX3 9DU, United Kingdom

9 <sup>2</sup> Department of Physiology, Faculty of Medical Sciences, University of Sri Jayewardenepura,  
10 Nugegoda, Sri Lanka

11 <sup>3</sup> Target Discovery Institute, Centre for Medicines Discovery, Nuffield Department of  
12 Medicine University of Oxford, Oxford OX3 7FZ, UK

13 <sup>4</sup> Vascular Physiology Laboratory, Group of Research and Innovation in Vascular Health,  
14 Department of Basic Sciences, Universidad del Bío-Bío, Chillán, Chile.

15  
16 *Running title:* Kynurenine is metabolized by syncytiotrophoblast extracellular vesicles.

17  
18 \*Correspondence: Manu Vatish  
19 University of Oxford  
20 Nuffield Department of Women's & Reproductive Health  
21 Level 3, Women's Centre  
22 John Radcliffe Hospital  
23 Oxford OX3 9DU  
24 manu.vatish@wrh.ox.ac.uk  
25

26 **Abstract**

27 **Background:** Placentae of women with preeclampsia (PE) exhibit reduced levels of  
28 kynurenine (Kyn), a biological compound derived from tryptophan metabolism with  
29 antioxidant, vasorelaxant, and hypotensive properties. Little is known regarding functional  
30 levels of the Kyn metabolizing enzymes (KYNME) in women with preeclampsia. Since high  
31 circulating levels of syncytiotrophoblast extracellular vesicles (STB-EVs) have been  
32 associated with preeclampsia onset, we aimed to study whether Kyn reduction in  
33 preeclampsia may be attributed to increased degradation by KYNME present in STB-EVs.

34 **Methods:** We conducted a study that included women with normal (n=9) and early-onset  
35 preeclamptic (EOPE) pregnancies (n=9). From them, STB-EVs were isolated by dual-lobe  
36 placental perfusions from normal (n=3) and EOPE (n=3). KYNME were identified using  
37 placental immunohistochemistry and western blot in placental and STB-EV extractions.  
38 Serum Kyn levels were measured using gas chromatography mass spectrometry.

39 **Results:** Cargo of STB-EVs consist of functional KYNME, which break down Kyn in a dose  
40 and time-dependent manner. No significant differences in the content of Kyn metabolizing  
41 enzymes were found in STB-EVs between normal and EOPE pregnancies. However,  
42 decreased serum levels of Kyn were found in women with EOPE relative to normal  
43 pregnancies.

44 **Conclusion:** STB-EVs carry functional KYNME and may regulate the levels of circulating  
45 Kyn during normal pregnancy and preeclampsia. Due to the dose effect of increased STB-  
46 EVs in EOPE, the functional KYNME content of said vesicles may contribute to reduced  
47 levels of Kyn. This finding opens a new avenue for investigating the potential benefits of  
48 KYNME inhibitors in conjunction with kynurenine replacement for managing preeclampsia.

49  
50 **Key words:** Extracellular vesicles; preeclampsia; Kynurenine; Tryptophan; Kynurenine  
51 metabolising enzymes

52 **Manuscript word count: 5992**

53 **Abstract word count: 250**

54 **Financial disclosure:** The study was funded by internal contingency funds.

55 **Conflict of interest:** none

56 **Number of figures:** 5

57 **Number of references:** 43

58 **Keycode:** Placenta extracellular vesicles; normal pregnancy; preeclampsia.

59 **Abbreviations:** Chlorotrimethylsilane (TMCS). Comprehensive two-dimensional gas  
60 chromatography (GCxGC-MS). Early-onset preeclampsia (EOPE). Extracellular vesicles  
61 (EVs). Gas Chromatography Mass Spectrometry (GCMS). International Society for the Study  
62 of Hypertension in Pregnancy (ISSHP). Kynureninase (Kynu). Kynurenine (Kyn).  
63 Kynurenine aminotransferase III (KAT-III). Kynurenine monooxygenase (KMO).  
64 Kynurenine metabolizing enzymes (KYNME). Medium/large syncytiotrophoblast  
65 extracellular vesicles (m/ISTB-EVs). N-Methyl-N-trimethylsilyltrifluoroacetamide  
66 (MSTFA). Nanoparticle tracking analysis (NTA). Normal pregnancy (NP). Placenta alkaline  
67 phosphatase (PLAP). Placental indoleamine 2,3-dioxygenase (IDO). Preeclampsia (PE).  
68 Small syncytiotrophoblast extracellular vesicles (sSTB-EVs). Syncytiotrophoblast (STB).  
69 Syncytiotrophoblast extracellular vesicles (STB-EVs). Tryptophan (Trp)

70

71

72

### 73 **Introduction**

74 Preeclampsia (PE) is a multisystem disorder unique to human pregnancy affecting 2% - 8%  
75 of pregnancies worldwide<sup>1,2</sup> and a leading cause of maternal morbidity and mortality<sup>3,4</sup>. The  
76 International Society for the Study of Hypertension in Pregnancy (ISSHP) defines  
77 preeclampsia as, *de novo* hypertension (systolic blood pressure, SBP>140mmHg and  
78 diastolic blood pressure, DBP>90mmHg) with either new-onset proteinuria, or evidence of  
79 other maternal end-organ dysfunction (including liver, kidney, neurological); haematological  
80 involvement; or uteroplacental dysfunction<sup>5</sup>.

81 Preeclampsia is thought to originate because of poor placentation<sup>6,7</sup>. In a pathophysiological  
82 context, the clinical syndrome is triggered by the release of placental pro-inflammatory, anti-  
83 angiogenic, pro-coagulant factors, and syncytiotrophoblast extracellular vesicles (STB-EVs)  
84 as a response to syncytiotrophoblast (STB) stress. These biomolecules mediate maternal  
85 endothelial dysfunction, deranged angiogenic balance, vasoconstriction and resultant  
86 hypertension, and end organ damage<sup>6,8</sup>.

87 The syncytiotrophoblast (the outer maternal facing membrane of the chorionic villus) is  
88 known to release extracellular vesicles (STB-EVs) into the maternal circulation throughout  
89 pregnancy<sup>9</sup>. STB-EVs are membrane bound lipid particles that carry extravesicular proteins  
90 and intra-vesicular cargo comprising of lipids, nucleic acids, and proteins, which may play an  
91 essential role in the physiological changes accompanying pregnancy<sup>10</sup>. STB-EVs are  
92 classified based on their size; medium/large STB-EVs (m/ISTB-EVs) are 200 nm to 1  $\mu$ m,  
93 and small STB-EVs (sSTB-EVs) are ~30-200 nm<sup>11,12</sup>. m/ISTB-EVs are shed directly from the  
94 STB layer via budding of the cell membrane in response to cell activation, cell stress or cell  
95 death<sup>13</sup>. In contrast, sSTB-EVs are released from intracellular multivesicular bodies of STB

96 by exocytosis, and they may play a key role in intercellular communication<sup>14</sup>. Importantly,  
97 women with PE and specially those who present with early-onset PE (PE diagnosed before 34  
98 weeks of gestation, EOPE) have shown high quantity of circulating STB-EVs compared with  
99 normal pregnancy<sup>15,16</sup>. Increasing evidence reports that STB-EVs may contribute to the  
100 pathogenesis of PE by carrying pro and anti-angiogenic factors as cargoes<sup>17-19</sup>.

101 Previous reports have suggested the potential beneficial effects of Kynurenine (Kyn), a  
102 biologically active metabolite derived from Tryptophan (Trp) metabolism, in ameliorating  
103 detrimental consequences of PE<sup>20</sup>. Kyn is found to be an antioxidant<sup>21</sup> a vasorelaxant<sup>22,23</sup>, and  
104 a hypotensive agent<sup>22</sup>. Kyn has previously been reported to be reduced in placental explant  
105 culture medium of PE compared to normal pregnancy (NP)<sup>24</sup>. Recently, it has been shown  
106 that replacing Kyn in pregnant mice with PE-like phenotype induced by uni-nephrectomy  
107 was sufficient to improve placental blood flow abnormalities and the PE-like phenotype<sup>25,26</sup>.  
108 These findings prompted the hypothesis that Kyn replacement may serve as a therapeutic  
109 intervention to treat the clinical syndrome in PE<sup>25</sup>.

110 Furthermore, Trp is metabolised by 4 different pathways (serotonin pathway, tryptamine  
111 pathway, indole pyruvic acid pathway and kynurenine pathway), but the Kyn pathway  
112 accounts for ~95% of overall Trp degradation<sup>27,28</sup>. The reduction in Kyn in PE was initially  
113 attributed to reduced expression of indoleamine 2,3-dioxygenase (IDO) by the placenta, an  
114 enzyme responsible for breakdown of Trp to Kyn<sup>29</sup>. However, the role of the Kyn  
115 metabolising enzymes (KYNME)—Kynureninase (Kynu), Kynurenine aminotransferase III  
116 (KAT-III) and Kynurenine monooxygenase (KMO)—responsible for breakdown Kyn has not  
117 been studied in PE<sup>30</sup>.

118 We aimed to study whether STB-EVs carry functionally active KYNME and if Kyn  
119 reduction in PE may be attributed to increased degradation by KYNME on STB-EVs.

120

## 121 **Methods**

### 122 **Human Subjects and Samples**

123 The study received ethical approval from the Central Oxfordshire Research Ethics Committee  
124 (RFS 07/H0607/74 & 07/H0606/148). Pregnant women who were scheduled to undergo an  
125 elective caesarean section at the Women's Centre, John Radcliffe Hospital in Oxford, were  
126 recruited for the study. Before the collection of placentae and blood, written informed  
127 consent was obtained from all participants. EOPE was described as outlined above, and the  
128 diagnosis was aided with an sFLT-1:PIGF ratio  $> 85$  (n=9), while gestationally matched  
129 women with normal pregnancies (NP) were selected based on no history of preeclampsia or  
130 hypertensive disorders and sFLT-1:PIGF ratio  $< 38^{31}$ .

131 Placentae were retrieved in the operating theatre and were perfused within 10 minutes (n=3  
132 for both NP and EOPE). Blood samples were collected before caesarean section from NP  
133 (n=9) and EOPE (n=9) women in plastic serum tubes (BD Vacutainer, UK) from the left  
134 antecubital fossa. These blood samples were then centrifuged (Thermo Multifuge X3R) at a  
135 rate of 3,000 RPM for 10 minutes at a temperature of  $21^{\circ}\text{C}$  to separate the serum. The serum  
136 was then aliquoted and stored at a temperature of  $-80^{\circ}\text{C}$  until analysis.

137 Placental biopsies were collected from the maternal facing surface (without the decidual  
138 layer) for protein expression analysis. Placental lysates were prepared using RIPA buffer  
139 (150 mM NaCl, 50 mM Tris pH 8.0, 0.1% SDS, 1% Triton X100, 0.5% sodium deoxycholate;  
140 ThermoFisher Scientific, UK) and a protease inhibitor cocktail (Sigma Aldrich, UK) and  
141 were subsequently subjected to a bicinchoninic acid (BCA) protein assay (Sigma Aldrich,  
142 UK). The lysates were then stored at  $-20^{\circ}\text{C}$  until analysis.

143 **Enrichment and Characterization of Syncytiotrophoblast Extracellular Vesicles (STB-**  
144 **EVs)**

145 STB-EVs were obtained from placentae using a modified ex-vivo dual lobe placental  
146 perfusion and differential ultracentrifugation method, as previously detailed by our group<sup>32-</sup>  
147 <sup>35</sup>. Placentae were subjected to a 3-hour perfusion process, after which the maternal side  
148 perfusate was collected and promptly centrifuged twice using a Beckman Coulter Avanti J-  
149 20XP centrifuge and a Beckman Coulter JS-5.3 swing-out rotor. The centrifugation was  
150 performed at 1,500 ×g for 10 minutes at 4<sup>0</sup>C to remove large cellular debris. The supernatant  
151 was then collected and centrifuged again at 10,000 × g for 35 minutes at 4<sup>0</sup>C to pellet  
152 m/ISTB-EVs. The m/ISTB-EVs were suspended in sterile PBS, and the remaining  
153 supernatant was filtered through a 0.22 μm Stericup filter (Millipore, UK) and then  
154 centrifuged at 150,000 ×g for 125 minutes at 4<sup>0</sup>C. This centrifugation was performed to pellet  
155 sSTB-EVs. The sSTB-EVs were then re-suspended in sterile phosphate buffered saline  
156 (PBS). The pellets containing m/ISTB-EVs and sSTB-EVs (from the 10K and 150K  
157 centrifugations) were assessed for protein concentration using BCA protein assay kit (Sigma  
158 Aldrich, UK).

159 **Syncytiotrophoblast Extracellular Vesicles (STB-EV) characterization using**  
160 **nanoparticle tracking analysis (NTA), transmission electron microscopy (TEM) and**  
161 **western blot**

162 The NanoSight NS500 equipped with a sCMOS camera and NTA software 2.3, Build 0033  
163 (Malvern Instruments, UK) was employed to evaluate the diameter and concentration of  
164 STB-EVs. The instrument was calibrated with silica 100 nm microspheres (Polysciences,  
165 UK). Following calibration, the size profile and concentration of STB-EVs were measured  
166 using a standard protocol described in earlier studies<sup>32</sup>.

167 In addition, sSTB-EVs were characterized by traditional immunoblotting using protein  
168 markers specific to sSTB-EVs, such as PLAP, a marker of syncytiotrophoblast origin, and  
169 well-known markers of exosomes, including Syntenin, Alix, CD63, and CD9, as  
170 recommended by the International Society for Extracellular Vesicles (ISEV). The results of  
171 this study confirm the origin of STB-EVs and their classification as exosomes (sSTB-EVs)<sup>36</sup>.

## 172 **Transmission electron microscopy (TEM)**

173 STB-EV pellets were resuspended in phosphate-buffered saline (PBS) to achieve a final  
174 concentration ranging from 0.1 to 0.3 µg/µl. Suspension (10 µl) was applied to freshly glow-  
175 discharged carbon Formvar-coated 300 mesh copper grids. The grids were then negatively  
176 stained with 2% uranyl acetate for 10 seconds, followed by blotting and air-drying. Imaging  
177 was performed using a FEI Tecnai 12 TEM operating at an acceleration voltage of 120 kV.  
178 Images were captured with a Gatan OneView CMOS camera.

## 179 **Western blot**

180 Immunoblotting was carried out under reducing conditions (except for CD63 performed in a  
181 non-reducing condition) and denaturing conditions. Placental lysates (30 µg/well) and  
182 m/ISTB-EVs or sSTB-EVs (20 µg/well) were separated by electrophoresis on a 4%-12%  
183 SDS-PAGE gel (Thermo Fisher, UK). The proteins were then transferred onto a PVDF  
184 membrane (Bio-Rad Laboratories, UK) using a Novex Semi-Dry Blotter (Life Technologies,  
185 Paisley, UK). The membranes were blocked for 1 hour at room temperature with 5% (w/v)  
186 Blotto (Alpha Diagnostic, UK) in TBS-T (Tris-buffered saline solution with 0.1% Tween-  
187 20), and then incubated with primary antibodies, including anti-ALIX antibody ([1 mg/ml] at  
188 1:1000 dilution, NBP1-49701, Novus Biologicals), anti-CD63 antibody ([200 µg/ml] at  
189 1:1000 dilution, Sc-59286, Santa Cruz Biotechnology), anti-CD9 ([100 µg/ml] at 1:1000  
190 dilution, Sc-59140, Santa Cruz Biotechnology), anti-cytochrome C ([200 µg/ml] at 1:1000

191 dilution, Sc-13156, Santa Cruz Biotechnology), and anti-PLAP ([1.67 µg/ml], at 1:1000  
192 dilution, NDOG-2, in-house antibody), overnight at 4<sup>0</sup>C. The membranes were washed using  
193 TBS-T, and then incubated with horseradish peroxidase (HRP)-conjugated secondary  
194 antibodies (Life Technologies, UK) in Blotto/0.1% TBS-T for 1 hour at room temperature.  
195 Then, the antigen-antibody complexes were visualized by chemiluminescence using an ECL  
196 kit (Thermo Scientific, UK).

### 197 **Capillary Electrophoresis and Jess Simple Western**

198 Diluted pooled STB-EVs (a mixture of m/ISTB-EVs and sSTB-EVs) obtained from NP (n=3)  
199 and PE (n=3) placental perfusion, diluted liver cell lysate [Novus Biologicals, UK; (positive  
200 control for KYNME)], and diluted placental tissue lysate (positive control for PLAP) were  
201 combined with fluorescent master mix and heated at 95<sup>0</sup>C for 5 min. Protein samples,  
202 blocking reagent, target primary antibody, secondary HRP (ready-to-use goat detection  
203 module [Jess, Protein Simple], ready-to-use rabbit detection module [Jess, Protein Simple],  
204 and ready-to-use mouse detection module [Jess, Protein Simple]), total protein detection  
205 reagent, chemiluminescent substrate, and wash buffer were dispensed into designated wells in  
206 the manufacturer-supplied microplate. Primary antibodies included goat anti-KYNU [R&D,  
207 UK] diluted 1:10, rabbit anti-KMO [R&D, UK] diluted 1:10, rabbit anti-KAT-111  
208 [MyBioSource, USA] diluted 1:10, and mouse anti-PLAP [NDOG2 in-house antibody]  
209 diluted 1:50. The plate was then loaded into the instrument (Jess, Protein Simple) and  
210 proteins were drawn into individual capillaries on a 13 / 25 capillary cassette (12-230 kDa).  
211 Data were analysed using the proprietary Compass software provided by the manufacturer.

### 212 **Immunohistochemistry**

213 The placental tissues obtained from the biopsies were fixed in a solution of 4% formaldehyde  
214 (v/v), embedded in paraffin blocks, and then sectioned at a thickness of 10 µm. These



215 sections were placed on slides, and the slides were then processed for histological analysis.  
216 Deparaffinized and rehydrated slides were subjected to heat treatment in a solution of 10 mM  
217 sodium citrate at pH 6.0 for 10 minutes to facilitate antigen retrieval. Following this, the  
218 slides were allowed to cool at room temperature. To block endogenous peroxidase activity,  
219 the slides were treated with 3% (v/v) H<sub>2</sub>O<sub>2</sub> in phosphate buffered saline (PBS). After that,  
220 slides were blocked for non-specific antibody binding with 10% fetal calf serum (FCS)  
221 (Sigma Aldrich, UK) in 0.01M PBS-T (PBS with Tween-20) (Sigma Aldrich, UK) at room  
222 temperature (1 hour). Placental sections were incubated overnight at 4<sup>0</sup>C with 1% FCS and  
223 respective target antibody, including either 1 µg/ml anti-Kynu primary antibody (OriGene,  
224 USA); or 1 µg/ml anti-KATIII primary antibody (Santa Cruz Biotechnology, USA); or 1  
225 µg/ml anti-KMO primary antibody (MyBioSource, USA) or non-immune mouse IgG1  
226 (Biolegend, UK) in PBS-T. The sections were then washed and incubated with α anti-mouse  
227 IgG secondary antibody conjugated to horseradish peroxidase (HRP) (Life Technologies,  
228 UK) in 10% v/v FCS for 1 hour at room temperature. The slides were then rinsed with PBS-T  
229 and stained with DAB (Vector Laboratories, USA). Afterward, hematoxylin solution  
230 (Thermo Fisher, UK) was used to stain cell's nucleus. The slides were then observed under a  
231 Leica DMIRE 2 microscope. Images were captured using Hamamatsu Orca digital camera  
232 and HCI software.

### 233 **Gas Chromatography Mass Spectrometry (GCMS)**

#### 234 **Sample preparation.**

235 Extraction of metabolites was carried out at room temperature if not indicated otherwise. 800  
236 µL of extraction solvent isopropanol (IPA) [1 % trifluoroacetic acid (TFA)] and 2.5 µL  
237 myristic acid-14,14,14-d<sub>3</sub> in IPA (1 mg/mL) were added into a bead beater tube with 100 µL  
238 of sample. The mixtures were subsequently homogenized in a bead beater (Precellys 24,

239 Bertin Technologies) for three cycles (5000 rpm x 20 s) with dry ice bath between the cycles.  
240 Then the mixtures were kept at  $-80^{\circ}\text{C}$  for 60 min and were centrifuged (20 min at 13,000g at  
241  $4^{\circ}\text{C}$ ). The supernatant (aqueous) was collected and transferred into the glass vial to dry under  
242 vacuum (Speedvac) overnight.

### 243 **Chemical derivatization**

244 Chemical derivatization was performed as previously described<sup>37</sup>. In brief, samples were  
245 resuspended in a mixture of 50  $\mu\text{L}$  N-Methyl-N-trimethylsilyltrifluoroacetamide (MSTFA)  
246 with 1% chlorotrimethylsilane (TMCS) and 50  $\mu\text{L}$  pyridine. The mixture was then incubated  
247 for one hour at  $60^{\circ}\text{C}$  at a shaking speed of 1200 rpm. After incubation, the samples were  
248 cooled to room temperature and injected directly for gas chromatography-mass spectrometry  
249 (GC-MS) analysis.

### 250 **Comprehensive two-dimensional gas chromatography (GCxGC-MS) analysis**

251 The samples were promptly analyzed using a GCxGC-MS system, which comprised a gas  
252 chromatograph coupled to a quadrupole mass spectrometer (Shimadzu GCMS QP2010 Ultra)  
253 and a Shimadzu AOC-20i/s auto sampler, as described previously<sup>38</sup>. The first-dimension  
254 separation was performed on a SHM5MS capillary column (30 m  $\times$  0.25 mm i.d.  $\times$  0.25  $\mu\text{m}$   
255 film thickness, Shimadzu, Japan). The second-dimension separation was carried out on a  
256 BPX-50 capillary column (5 m  $\times$  0.15 mm i.d.  $\times$  0.15  $\mu\text{m}$  film thickness, SGE, USA). Helium  
257 gas was employed as a carrier gas at a constant inlet head pressure of 73 psi. The modulation  
258 period was set to 4 seconds. The samples were injected at a temperature of  $280^{\circ}\text{C}$  in different  
259 split ratios of 1:1 or 1:10. The oven temperature was programmed to commence at  $100^{\circ}\text{C}$  and  
260 hold for 2 minutes, before increasing to  $220^{\circ}\text{C}$  at a rate of  $30^{\circ}\text{C}$  per minute and holding for an  
261 additional minute. The temperature was then raised to  $280^{\circ}\text{C}$  at a rate of  $5^{\circ}\text{C}$  per minute, held  
262 for 1 minute, and finally increased to  $300^{\circ}\text{C}$ , where it was held for 2 minutes. The interface

263 temperature between the mass spectrometer and the oven was set at 300<sup>0</sup>C, while the ion  
264 source was heated to 230<sup>0</sup>C. The mass spectrometer was operated at scan speeds ranging  
265 from 5,000 to 20,000 amu, covering a mass range of 45-600 m/z. Electron Ionization spectra  
266 were recorded at an energy of 70 eV.

## 267 **Data processing and analysis**

268 Raw GCxGC MS data were processed using GCMS solution software (version 2.72/4.20,  
269 Shimadzu), and Chromsquare software (version 2.1.6, Shimadzu) in combination with GC  
270 Image (version 2.3) and the NIST 11/s, OA\\_TMS, FA\\_ME, and YUTDI in-house libraries  
271 were used for data analysis. The annotation of kynurenine was carried out by comparing them  
272 to external standards, which included IM spectra and retention times adjusted to the internal  
273 standard myristic acid-14,14,14-d3. The quantitation of kynurenine was measured using the  
274 GCMS Solution software (version 4.2) as accumulated single ion monitoring (m/z 307).

## 275 **Statistics**

276 Graphs were created, and statistical analyses were conducted using GraphPad Prism  
277 (GraphPad Software V10.2.2, Boston, MA, USA). Comparison between the two groups was  
278 assessed using Student's paired/unpaired t-test, with a confidence interval of 95%. A *p*-value  
279 of <0.05 was considered statistically significant.

## 280 **Results**

### 281 **Demographics and clinical characteristics**

282 Table 1 illustrates the demographic characteristics of the women who were studied. As  
283 anticipated, women who experienced EOPE displayed significantly higher systolic and  
284 diastolic blood pressure, but lower gestational age at delivery, associated with lower birth

285 weight than women with NP ( $p < 0.0001$  in all cases). Additionally, the sFlt-1:PIGF ratio was  
286 higher in EOPE than NP women (599.3 vs 1.0) ( $p < 0.05$ ). However, no significant differences  
287 were observed in maternal age, body mass index (BMI), or gestational age at which blood  
288 samples were collected.

### 289 **STB-EVs characterisation by nanoparticle tracking analysis (NTA), transmission** 290 **electron microscopy (TEM) and western blot (WB)**

291 The results of the NTA revealed that the m/ISTB-EVs extracted from NP placentas were  
292 characterized by heterogeneity, with a modal size of  $250.8 \pm 26.1$  nm (Figure 1A). In  
293 contrast, the sSTB-EVs exhibited less heterogenic size distribution with a modal size of  $169.2$   
294  $\pm 8.7$  nm (Figure 1B).

295 TEM showed the typical cup-shaped morphology of extracellular vesicles. The 10K STB-EV  
296 pellet showed a size heterogeneity characteristic of m/ISTB-EVs (200 to 1000nm) while the  
297 150K STB-EV pellet showed a homogeneous EV size profile (less than or equal to 200 nm)  
298 (Figure 1A, 1B).

299 The western blot analysis confirmed that both types of EVs expressed the classic STB  
300 membrane marker, PLAP, and sSTB-EVs were particularly enriched for ALIX, CD9, and  
301 CD63. Furthermore, the results indicated that the m/ISTB-EVs and sSTB-EVs correctly  
302 lacked the negative EV marker cytochrome C (Figure 1C).

### 303 **KYNME expression in placental tissues**

304 Western blot analysis of whole placental lysates obtained from NP (n=3) and EOPE (n=3)  
305 exhibited the expression of KYNME including kynureninase (KYNU, 54 kDa), kynurenine  
306 monooxygenase (KMO, 59 kDa), and kynurenine aminotransferase III (KAT-III, 59 kDa)

307 (Figure 2A). Liver cell lysate served as the positive control for KYNME. The immunoblot  
308 was also probed for PLAP (~66 kDa) to confirm the placental origin of the samples (Figure  
309 2A). Qualitative estimation of KYNME found no change between NP and EOPE placental  
310 extractions.

311 Additionally, immunohistochemistry was used to confirm the expression of KYNME in the  
312 placenta, and the stromal-vascular bed (STB layer) exhibited intense KYNME staining in  
313 both EOPE and NP placental tissues (Figure 2B). Again, qualitative estimation of KYNME in  
314 the placental immunodetection showed no differences between NP and EOPE.

### 315 **KYNME expression in STB-EVs**

316 We sought to identify KYNME expression in pooled STB-EVs (mixture of m/STB-EVs and  
317 sSTB-EVs) obtained from ex-vivo dual lobe placental perfusion of NP (n=3) and EOPE  
318 (n=3) using capillary electrophoresis and western blot. Liver cell lysate and placental lysate  
319 were used as the positive controls for KYNME and PLAP, respectively. Surprisingly, all  
320 samples (NP and EOPE) tested positive for all three KYNME markers (KYNU, KMO, and  
321 KAT-III) and co-expressed PLAP (see Figure 3A). Simultaneous total protein analysis was  
322 conducted to ensure accurate results, and the Compass software was utilized to analyze the  
323 normalized observed band densities. The variations in KYNME expression between NP and  
324 EOPE samples were not statistically significant (see Figure 3B).

### 325 **Functional assessment of KYNME expressed in STB-EVs**

326 We sought to investigate the functional capacity of the KYNME expressed in STB-EVs (Fig  
327 4) by measuring levels of kynurenine using GCxGC-MS. Kynurenine solution was treated  
328 with varying amounts of STB-EVs (1  $\mu$ g and 5  $\mu$ g of total protein) and two different

329 incubation periods (5 min and 60 min). As a control, the kynurenine solution was incubated  
330 with STB-EVs treated with 100% trifluoroacetic acid to denature the protein cargo.

331 The results showed that both 1 µg and 5 µg of STB-EVs reduced the kynurenine levels by  
332 ~80% and ~90% respectively, compared to the control condition, ( $p < 0.05$  for both 1 µg and  
333 5 µg). Moreover, STB-EVs demonstrated a dose-dependent breakdown of kynurenine, as  
334 evidenced by the significant reduction in kynurenine levels when 5 µg of STB-EVs was used  
335 compared to 1 µg, in both incubation periods ( $p < 0.05$  in both cases).

### 336 **Measurement of serum kynurenine**

337 Using GCxGC-MS, we investigated the serum levels of kynurenine in women with EOPE  
338 (sFLT-1:PIGF ratio > 85) (n=9) and gestationally matched women with NP (sFLT-1:PIGF  
339 ratio < 38) (n=9) (Fig 5). Women with EOPE exhibited significantly lower levels of  
340 kynurenine compared with NP women ( $p < 0.05$ ) (Fig 5B).

### 341 **Discussion**

342 In this study, we describe for the first time that STB-EVs cargo includes functional  
343 kynurenine metabolising enzymes (KYNU, KMO and KAT-III). These enzymes breakdown  
344 kynurenine, a biologically active metabolite known for its antioxidant, vasodilatory and  
345 hypotensive effects. Despite no significant differences in the content of kynurenine  
346 metabolising enzymes being found between NP and EOPE STB-EVs, serum levels of  
347 kynurenine were significantly reduced in EOPE. While other possible causes of this  
348 discrepancy must be considered, these findings suggest that STB-EVs may participate in the  
349 regulation of circulating kynurenine levels in NP and EOPE. This is particularly true given  
350 that circulating levels of STB-EVs are higher in EOPE<sup>15,16</sup>. This dose effect may lead to  
351 higher concentrations of kynurenine metabolising enzymes and subsequently to reduced

352 levels of kynurenine. Whether STB-EV-mediated kynurenine metabolism participates in the  
353 cascade of placental, angiogenic or immunological defects observed in PE requires further  
354 investigation.

355 During normal pregnancy, tryptophan metabolism to kynurenine is increased due to the  
356 upregulation of placental indoleamine 2,3-dioxygenase (IDO) expression<sup>39</sup>, which may play a  
357 critical role in mediating immune tolerance<sup>40,41</sup> and vascular remodelling in the maternal-  
358 foetal interface<sup>42,43</sup>. In PE placental culture, the culture media have been found to have  
359 reduced kynurenine levels, which has been attributed to the reduced expression of the IDO  
360 enzyme in the PE placenta<sup>24</sup>. Based on existing literature, we hypothesized that STB-EVs  
361 express functionally active KYNME in addition to placental expression. Since the STB layer  
362 of the placenta is known to extrude extracellular vesicles into the circulation, we believe that  
363 the enzymes expressed on the STB-EVs could scavenge circulating kynurenine and reduce  
364 the levels of available circulating kynurenine.

365 Our study provided evidence of the presence of KYNME in the placental tissue through  
366 immunohistochemistry and western blot in both NP and PE placentae. The  
367 immunohistochemistry staining intensity was highest in the STB layer in both NP and EOPE  
368 placentae. We discovered that KYNME was expressed in STB-EVs obtained from NP and  
369 EOPE placental perfusions, and the expression levels were similar. However, previous  
370 research by our group showed that PE placentae release significantly more STB-EVs per unit  
371 of blood than NP<sup>16</sup>. Therefore, it is possible that the quantity of STB-EV carried KYNME per  
372 unit of blood is also higher in PE than in NP. This hypothesis is at least partly supported by  
373 our findings, which showed that kynurenine levels were significantly reduced when exposed  
374 to a higher quantity of STB-EVs (carrying functional KYNME) derived from NP implying a  
375 dose response relationship between STB-EVs and kynurenine levels. Furthermore, we

376 validated our findings by observing a significant reduction in serum kynurenine levels in  
377 biochemically and clinically confirmed EOPE women compared to gestationally matched  
378 controls.

379 Recent research has demonstrated that kynurenine replacement was effective in reversing  
380 abnormal placentation and reducing the likelihood of developing PE in uni-nephrectomised  
381 mice<sup>25</sup>. Our research presents a novel approach to investigate the function of STB-EVs from  
382 NP and PE in regulating kynurenine metabolism. For example, our findings indicate that  
383 exposing kynurenine to STB-EVs denatured using 100% trifluoroacetic acid (TFA) results in  
384 significantly higher levels of kynurenine. This opens the possibility of exploring the use of  
385 specific inhibitors for individual kynurenine metabolizing enzymes to mitigate the breakdown  
386 of kynurenine.

387 Despite the relevance of our findings, we acknowledge limitations in our study including the  
388 small sample size in our analysis. In this study, we used relatively stringent criteria to define  
389 EOPE, which was aimed to generate as homogenous a disease pathophysiology as is possible  
390 in this complex condition. Recruitment was difficult with a distinct phenotype from its late  
391 onset component (LOPE), not only due to clinical complications which are sometimes  
392 emergent, but the relative rarity of EOPE in our institution, as it is in other institutions from  
393 high income countries.

394 In conclusion, our research unveils functional KYNME expression in STB-EVs from NP and  
395 PE patients, offering new insights into the clinical syndrome of preeclampsia. Our findings  
396 raise important questions about the potential effectiveness of kynurenine replacement as a  
397 strategy for managing preeclampsia and suggest that further investigation is needed to  
398 explore the role of KYNME inhibitors in conjunction with kynurenine replacement as a better  
399 alternative for managing the condition.



400 **Clinical perspective**

401 This study presents the first evidence of functional kynurenine metabolizing enzymes  
402 (KYNME) associated with circulating syncytiotrophoblast-derived extracellular vesicles  
403 (STB-EVs). Previous work by our group has shown that syncytiotrophoblasts in EOPE  
404 patients shed a greater number of EVs<sup>15,16</sup>, which translates to an increased concentration of  
405 circulating KYNME per unit blood volume. This may potentially explain in part the observed  
406 reduction in serum kynurenine levels in EOPE. Based on these findings, future research  
407 should explore the therapeutic potential of co-administering specific KYNME inhibitors with  
408 kynurenine replacement therapy to effectively elevate circulating kynurenine levels in EOPE  
409 patients.

410 Furthermore, our in vitro data reveals a dose- and time-dependent breakdown of kynurenine  
411 by STB-EVs. This opens a promising new avenue for the development of sensitive and  
412 specific tools for detecting kynurenine metabolites as potential biomarkers of EOPE. Future  
413 research efforts should explore the feasibility of utilizing these metabolites for early diagnosis  
414 and disease monitoring in EOPE patients.

415 **Conflict of interest**

416 None to declare.

417 **Author contribution**

418 MV conceptualized the study and lead the research team. PL performed most of the  
419 experiments in this manuscript. TA, MW, ZY and WZ performed selected experiments. SC  
420 and MV were responsible for patient recruitment. PL, TA, BK, CE, WZ and MV edited the  
421 manuscript. BK, SC and MV supervised the project. All co-authors approved the final version  
422 of this manuscript.

## 423 Acknowledgements

424 We acknowledge senior research midwife Fenella Roseman and research midwife Lotoyah  
425 Carty who kindly recruited the patients for the study.

## 426 References

- 427 1. Duley L. The Global Impact of Pre-eclampsia and Eclampsia. *Semin Perinatol.*  
428 2009;33(3):130-137. doi:10.1053/j.semperi.2009.02.010
- 429 2. Hypertension in Pregnancy. *Obstetrics & Gynecology.* 2013;122(5):1122-1131.  
430 doi:10.1097/01.AOG.0000437382.03963.88
- 431 3. Ness RB, Roberts JM. Heterogeneous causes constituting the single syndrome of  
432 preeclampsia: A hypothesis and its implications. *Am J Obstet Gynecol.*  
433 1996;175(5):1365-1370. doi:10.1016/S0002-9378(96)70056-X
- 434 4. Steegers EA, von Dadelszen P, Duvekot JJ, Pijnenborg R. Pre-eclampsia. *The Lancet.*  
435 2010;376(9741):631-644. doi:10.1016/S0140-6736(10)60279-6
- 436 5. Brown MA, Magee LA, Kenny LC, et al. The hypertensive disorders of pregnancy:  
437 ISSHP classification, diagnosis & management recommendations for international  
438 practice. *Pregnancy Hypertens.* 2018;13. doi:10.1016/j.preghy.2018.05.004
- 439 6. Redman CWG, Sacks GP, Sargent IL. Preeclampsia: An excessive maternal  
440 inflammatory response to pregnancy. *Am J Obstet Gynecol.* 1999;180(2):499-506.  
441 doi:10.1016/S0002-9378(99)70239-5
- 442 7. Redman CW, Sargent IL, Staff AC. IFPA Senior Award Lecture: Making sense of pre-  
443 eclampsia – Two placental causes of preeclampsia? *Placenta.* 2014;35.  
444 doi:10.1016/j.placenta.2013.12.008
- 445 8. Redman CWG, Staff AC, Roberts JM. Syncytiotrophoblast stress in preeclampsia: the  
446 convergence point for multiple pathways. *Am J Obstet Gynecol.* 2022;226(2):S907-  
447 S927. doi:10.1016/j.ajog.2020.09.047
- 448 9. Awoyemi T, Cerdeira AS, Zhang W, et al. Preeclampsia and syncytiotrophoblast  
449 membrane extracellular vesicles (STB-EVs). *Clin Sci.* 2022;136(24):1793-1807.  
450 doi:10.1042/CS20220149
- 451 10. Baig S, Kothandaraman N, Manikandan J, et al. Proteomic analysis of human placental  
452 syncytiotrophoblast microvesicles in preeclampsia. *Clin Proteomics.* 2014;11(1):40.  
453 doi:10.1186/1559-0275-11-40
- 454 11. Dragovic RA, Collett GP, Hole P, et al. Isolation of syncytiotrophoblast microvesicles  
455 and exosomes and their characterisation by multicolour flow cytometry and  
456 fluorescence Nanoparticle Tracking Analysis. *Methods.* 2015;87:64-74.  
457 doi:10.1016/j.ymeth.2015.03.028
- 458 12. Awoyemi T, Motta-Mejia C, Zhang W, et al. Syncytiotrophoblast Extracellular  
459 Vesicles From Late-Onset Preeclampsia Placentae Suppress Pro-Inflammatory

- 460 Immune Response in THP-1 Macrophages. *Front Immunol.* 2021;12.  
461 doi:10.3389/fimmu.2021.676056
- 462 13. Lv Y, Tan J, Miao Y, Zhang Q. The role of microvesicles and its active molecules in  
463 regulating cellular biology. *J Cell Mol Med.* 2019;23(12):7894-7904.  
464 doi:10.1111/jcmm.14667
- 465 14. Théry C. Exosomes: secreted vesicles and intercellular communications. *F1000 Biol*  
466 *Rep.* 2011;3. doi:10.3410/B3-15
- 467 15. Knight M, Redman CWG, Linton EA, Sargent IL. Shedding of syncytiotrophoblast  
468 microvilli into the maternal circulation in pre-eclamptic pregnancies. *BJOG.*  
469 1998;105(6):632-640. doi:10.1111/j.1471-0528.1998.tb10178.x
- 470 16. Goswami D, Tannetta DS, Magee LA, et al. Excess syncytiotrophoblast microparticle  
471 shedding is a feature of early-onset pre-eclampsia, but not normotensive intrauterine  
472 growth restriction. *Placenta.* 2006;27(1). doi:10.1016/j.placenta.2004.11.007
- 473 17. Gardiner C, Tannetta DS, Simms CA, Harrison P, Redman CWG, Sargent IL.  
474 Syncytiotrophoblast Microvesicles Released from Pre-Eclampsia Placentae Exhibit  
475 Increased Tissue Factor Activity. *PLoS One.* 2011;6(10):e26313.  
476 doi:10.1371/journal.pone.0026313
- 477 18. Ribeiro MF, Zhu H, Millard RW, Fan GC. Exosomes Function in Pro- and Anti-  
478 Angiogenesis. *Curr Angiogenes.* 2013;2(1):54-59.  
479 doi:10.2174/22115528113020020001
- 480 19. Guller S, Tang Z, Ma YY, Di Santo S, Sager R, Schneider H. Protein composition of  
481 microparticles shed from human placenta during placental perfusion: Potential role in  
482 angiogenesis and fibrinolysis in preeclampsia. *Placenta.* 2011;32(1):63-69.  
483 doi:10.1016/j.placenta.2010.10.011
- 484 20. Worton SA, Pritchard HAT, Greenwood SL, et al. Kynurenine Relaxes Arteries of  
485 Normotensive Women and Those With Preeclampsia. *Circ Res.* 2021;128(11):1679-  
486 1693. doi:10.1161/CIRCRESAHA.120.317612
- 487 21. Rios C, Santamaria A. Quinolinic acid is a potent lipid peroxidant in rat brain  
488 homogenates. *Neurochem Res.* 1991;16(10). doi:10.1007/BF00966592
- 489 22. Wang Y, Liu H, McKenzie G, et al. Kynurenine is an endothelium-derived relaxing  
490 factor produced during inflammation. *Nat Med.* 2010;16(3). doi:10.1038/nm.2092
- 491 23. Sakakibara K, Feng GG, Li J, et al. Kynurenine causes vasodilation and hypotension  
492 induced by activation of KCNQ-encoded voltage-dependent K<sup>+</sup> channels. *J*  
493 *Pharmacol Sci.* 2015;129(1). doi:10.1016/j.jphs.2015.07.042
- 494 24. Dunn WB, Brown M, Worton SA, et al. Changes in the Metabolic Footprint of  
495 Placental Explant-Conditioned Culture Medium Identifies Metabolic Disturbances  
496 Related to Hypoxia and Pre-Eclampsia. *Placenta.* 2009;30(11).  
497 doi:10.1016/j.placenta.2009.08.008
- 498 25. Dupont V, Berg AH, Yamashita M, et al. Impaired renal reserve contributes to  
499 preeclampsia via the kynurenine and soluble fms-like tyrosine kinase 1 pathway.  
500 *Journal of Clinical Investigation.* Published online August 9, 2022.  
501 doi:10.1172/JCI158346

- 502 26. Levine RJ, Maynard SE, Qian C, et al. Circulating Angiogenic Factors and the Risk of  
503 Preeclampsia. *New England Journal of Medicine*. 2004;350(7).  
504 doi:10.1056/NEJMoa031884
- 505 27. Bender DA. Biochemistry of tryptophan in health and disease. *Mol Aspects Med*.  
506 1983;6(2):101-197. doi:10.1016/0098-2997(83)90005-5
- 507 28. Badawy AAB. Tryptophan Metabolism in Alcoholism. In: ; 1999:265-274.  
508 doi:10.1007/978-1-4615-4709-9\_33
- 509 29. Kudo Y, Boyd CAR, Sargent IL, Redman CWG. Decreased tryptophan catabolism by  
510 placental indoleamine 2,3-dioxygenase in preeclampsia. *Am J Obstet Gynecol*.  
511 2003;188(3). doi:10.1067/mob.2003.156
- 512 30. Badawy AAB. Kynurenine pathway of tryptophan metabolism: Regulatory and  
513 functional aspects. *International Journal of Tryptophan Research*. 2017;10(1).  
514 doi:10.1177/1178646917691938
- 515 31. Cerdeira AS, O'Sullivan J, Ohuma EO, et al. Randomized Interventional Study on  
516 Prediction of Preeclampsia/Eclampsia in Women With Suspected Preeclampsia.  
517 *Hypertension*. 2019;74(4). doi:10.1161/HYPERTENSIONAHA.119.12739
- 518 32. Dragovic RA, Collett GP, Hole P, et al. Isolation of syncytiotrophoblast microvesicles  
519 and exosomes and their characterisation by multicolour flow cytometry and  
520 fluorescence Nanoparticle Tracking Analysis. *Methods*. 2015;87:64-74.  
521 doi:10.1016/j.ymeth.2015.03.028
- 522 33. Jiang S, Zhang W, Cao Q, et al. ExoCounter Assays Identify Women Who May  
523 Develop Early-Onset Preeclampsia From 12.5  $\mu$ L First-Trimester Serum by  
524 Characterizing Placental Small Extracellular Vesicles. *Hypertension*. 2023;80(7):1439-  
525 1451. doi:10.1161/HYPERTENSIONAHA.123.20907
- 526 34. Awoyemi T, Jiang S, Rahbar M, et al. MicroRNA analysis of medium/large placenta  
527 extracellular vesicles in normal and preeclampsia pregnancies. *Front Cardiovasc Med*.  
528 2024;11. doi:10.3389/fcvm.2024.1371168
- 529 35. Awoyemi T, Zhang W, Rahbar M, et al. A cross-sectional analysis of  
530 syncytiotrophoblast membrane extracellular vesicles-derived transcriptomic  
531 biomarkers in early-onset preeclampsia. *Front Cardiovasc Med*. 2023;10.  
532 doi:10.3389/fcvm.2023.1291642
- 533 36. Théry C, Witwer KW, Aikawa E, et al. Minimal information for studies of  
534 extracellular vesicles 2018 (MISEV2018): a position statement of the International  
535 Society for Extracellular Vesicles and update of the MISEV2014 guidelines. *J*  
536 *Extracell Vesicles*. 2018;7(1):1535750. doi:10.1080/20013078.2018.1535750
- 537 37. Yu Z, Huang H, Zhang H, Kessler BM. Improved profiling of polyamines using two-  
538 dimensional gas chromatography mass spectrometry. *Talanta*. 2019;199:184-188.  
539 doi:10.1016/j.talanta.2019.02.062
- 540 38. Yu Z, Huang H, Reim A, et al. Optimizing 2D gas chromatography mass spectrometry  
541 for robust tissue, serum and urine metabolite profiling. *Talanta*. 2017;165:685-691.  
542 doi:10.1016/j.talanta.2017.01.003
- 543 39. Broekhuizen M, Danser AHJ, Reiss IKM, Merkus D. The Function of the Kynurenine  
544 Pathway in the Placenta: A Novel Pharmacotherapeutic Target? *Int J Environ Res*  
545 *Public Health*. 2021;18(21):11545. doi:10.3390/ijerph182111545

- 546 40. Munn DH, Zhou M, Attwood JT, et al. Prevention of allogeneic fetal rejection by  
547 tryptophan catabolism. *Science*. 1998;281(5380):1191-1193.  
548 doi:10.1126/science.281.5380.1191
- 549 41. Munn DH, Shafizadeh E, Attwood JT, Bondarev I, Pashine A, Mellor AL. Inhibition  
550 of T Cell Proliferation by Macrophage Tryptophan Catabolism. *J Exp Med*.  
551 1999;189(9):1363-1372. doi:10.1084/jem.189.9.1363
- 552 42. Zardoya-Laguardia P, Blaschitz A, Hirschmugl B, et al. Endothelial indoleamine 2,3-  
553 dioxygenase-1 regulates the placental vascular tone and is deficient in intrauterine  
554 growth restriction and pre-eclampsia. *Sci Rep*. 2018;8(1):5488. doi:10.1038/s41598-  
555 018-23896-0
- 556 43. Broekhuizen M, Klein T, Hitzerd E, et al. Tryptophan-Induced Vasodilation Is  
557 Enhanced in Preeclampsia. *Hypertension*. 2020;76(1):184-194.  
558 doi:10.1161/HYPERTENSIONAHA.120.14970

559

560 **Table legend**

561 **Table 1. Clinical characteristics of studied women.**

562 Note: Values presented as mean  $\pm$  SD. SBP, systolic blood pressure. DPB, diastolic blood  
563 pressure. BMI, body mass index ( $\text{kg}/\text{m}^2$ ).

564

565 **Figure legend.**

566 **Figure 1. Characterization of large/medium and small STB-EVs isolated from normal**  
567 **pregnancies. A)** Representative characterization of medium/large STB-EVs, and **B)** small  
568 STB-EVs by NTA. Inserted images are representative pictures of respective STB-EVs  
569 characterized by TEM. Right, scale bar = 1000 nm. Left, scale bar = 2  $\mu\text{m}$ . White square  
570 represent section amplified. N=3 per group. **C)** Representative images of Western blot for  
571 detecting placental origin of STB-EVs. Placental alkaline phosphatase (PLAP) was used as  
572 placental marker. CD63, CD9 and Alix were used as positive marker of EVs. Cytochrome C  
573 (CYT.C) was used as negative marker of EVs.

574

575 **Figure 2. Placental protein expression of kynurenine metabolising enzymes (KYNME).**

576 **A)** Placental lysates obtained from normal pregnancy (NP, n=3) and preeclamptic  
577 pregnancies (EOPE, n=3) probed for KYNME and placental alkaline phosphatase (PLAP).  
578 HEPG2 cell lysate used as positive control. **B)** Immunohistochemistry analysis of placental  
579 expression of Anti KYNU (1); Anti KAT III (2) and Anti KMO (3) in NP and EOPE  
580 placentas. Arrows indicate presence of these proteins in the syncytiotrophoblast cells.

581

582 **Figure 3. KYNMEs are expressed by STB-EVs isolated from normal and preeclamptic**  
583 **pregnancies. A)** Representative images of capillary electrophoresis of KYNME including  
584 KYNU, KMO, and KAT-III in STB-EVs extracted from normal (NP, n=3) and preeclamptic  
585 pregnancies (EOPE, n=3). Placental alkaline phosphatase (PLAP) was used as placental  
586 marker. Liver cell and placental lysates were used as respective positive and negative  
587 controls. **B)** Relative values of KYNMEs after normalizing for total protein. NS, non-  
588 statistical significance. Values are presented as mean  $\pm$  SD.

589

590 **Figure 4. STB-EVs isolated from normal pregnancy break down kynurenine. A)**  
591 Percentage of kynurenine metabolized with STB-EVs (1  $\mu$ g, red bar; and 5  $\mu$ g, green bar, of  
592 total protein) isolated from normal pregnancy placentae (n=3). Two different incubation time  
593 were tested. **B)** 5 min, and **C)** 60 min of incubation with STB-EVs. Denatured STB-EVs  
594 (using 100% trifluoroacetic acid) were used as control. Each dot represents an individual STB-  
595 EV extraction. Values are presented as mean  $\pm$  SD. *p* value is indicated in each comparison.

596

597 **Figure 5. Serum kynurenine levels in normal and preeclamptic pregnancies. A)**  
598 Representative chart of gas chromatography mass spectrometry for kynurenine (KYN)  
599 detection in serum from normal (NP, n=9, pink) and preeclamptic pregnancies (EOPE, n=9,  
600 blue). As a control we used an in-house library of KYN (black). **B)** Amplification of the  
601 chromatogram in which KYN is detected. Notice the differences in the peak generated in NP  
602 and EOPE samples. **C)** KYN levels presented as mean  $\pm$  SD. Each dot represents an  
603 individual. *p* value is indicated in each comparison.

### Medium/Large STB-EVs

**A**

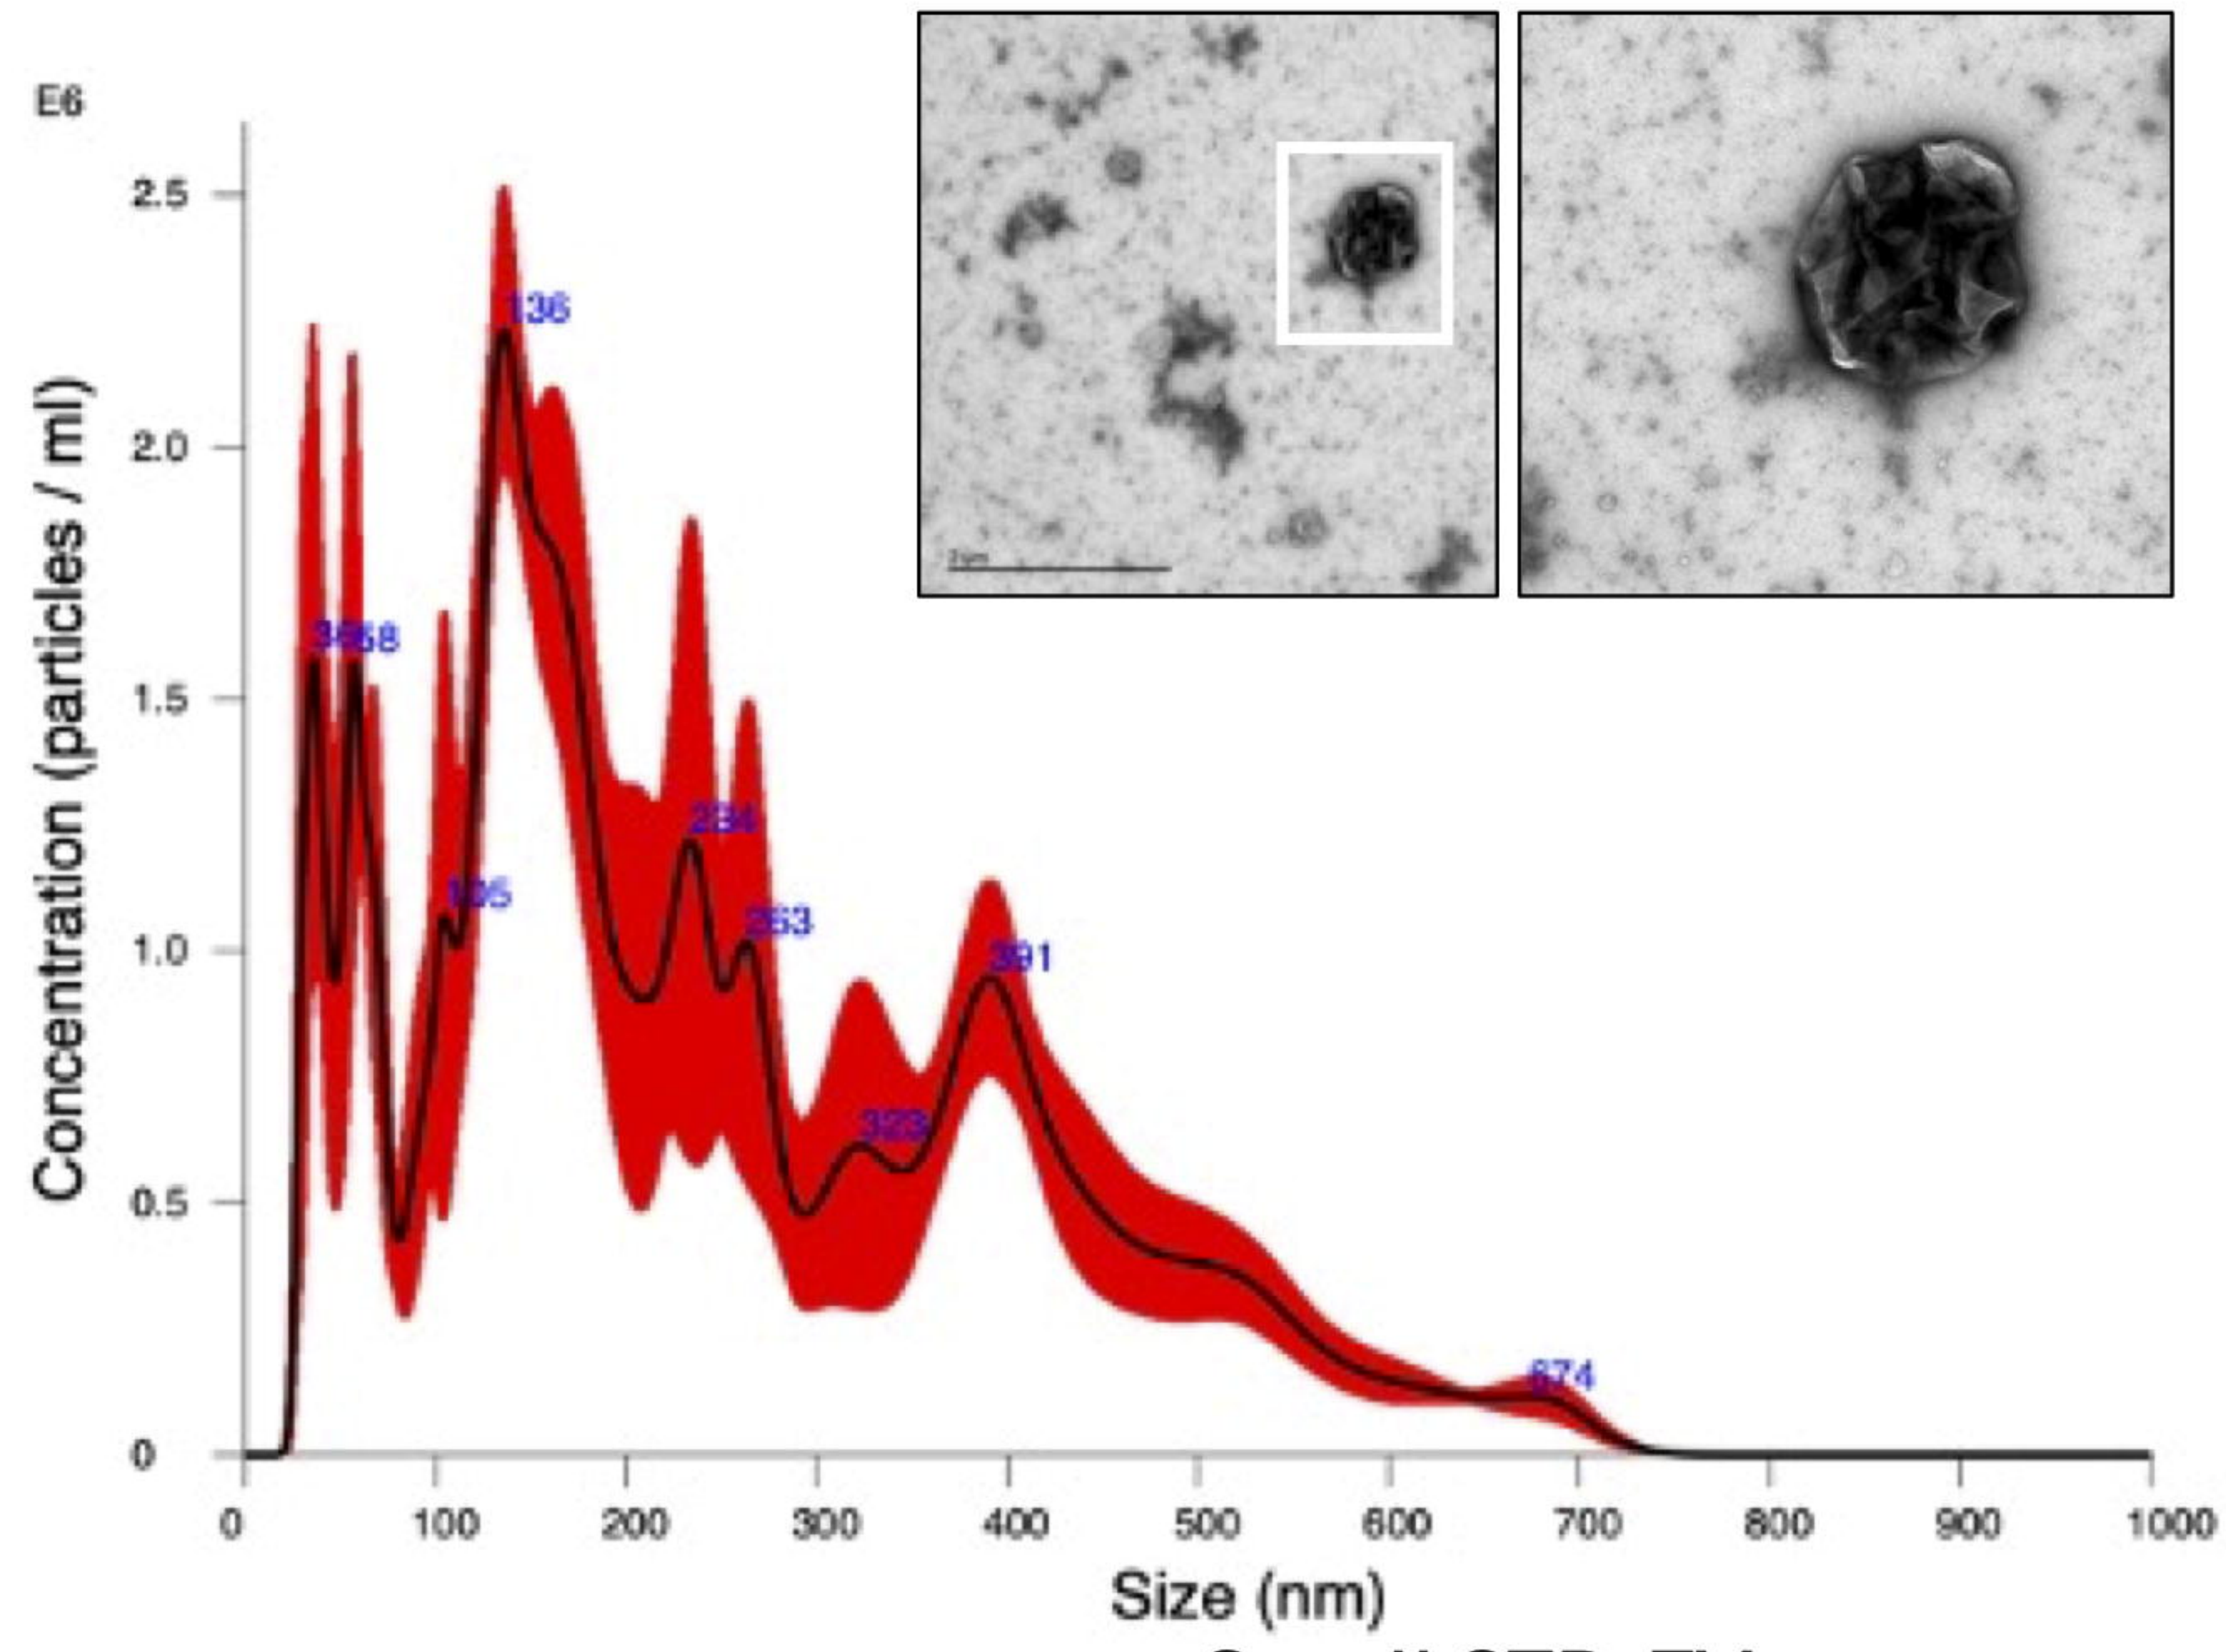

**B**

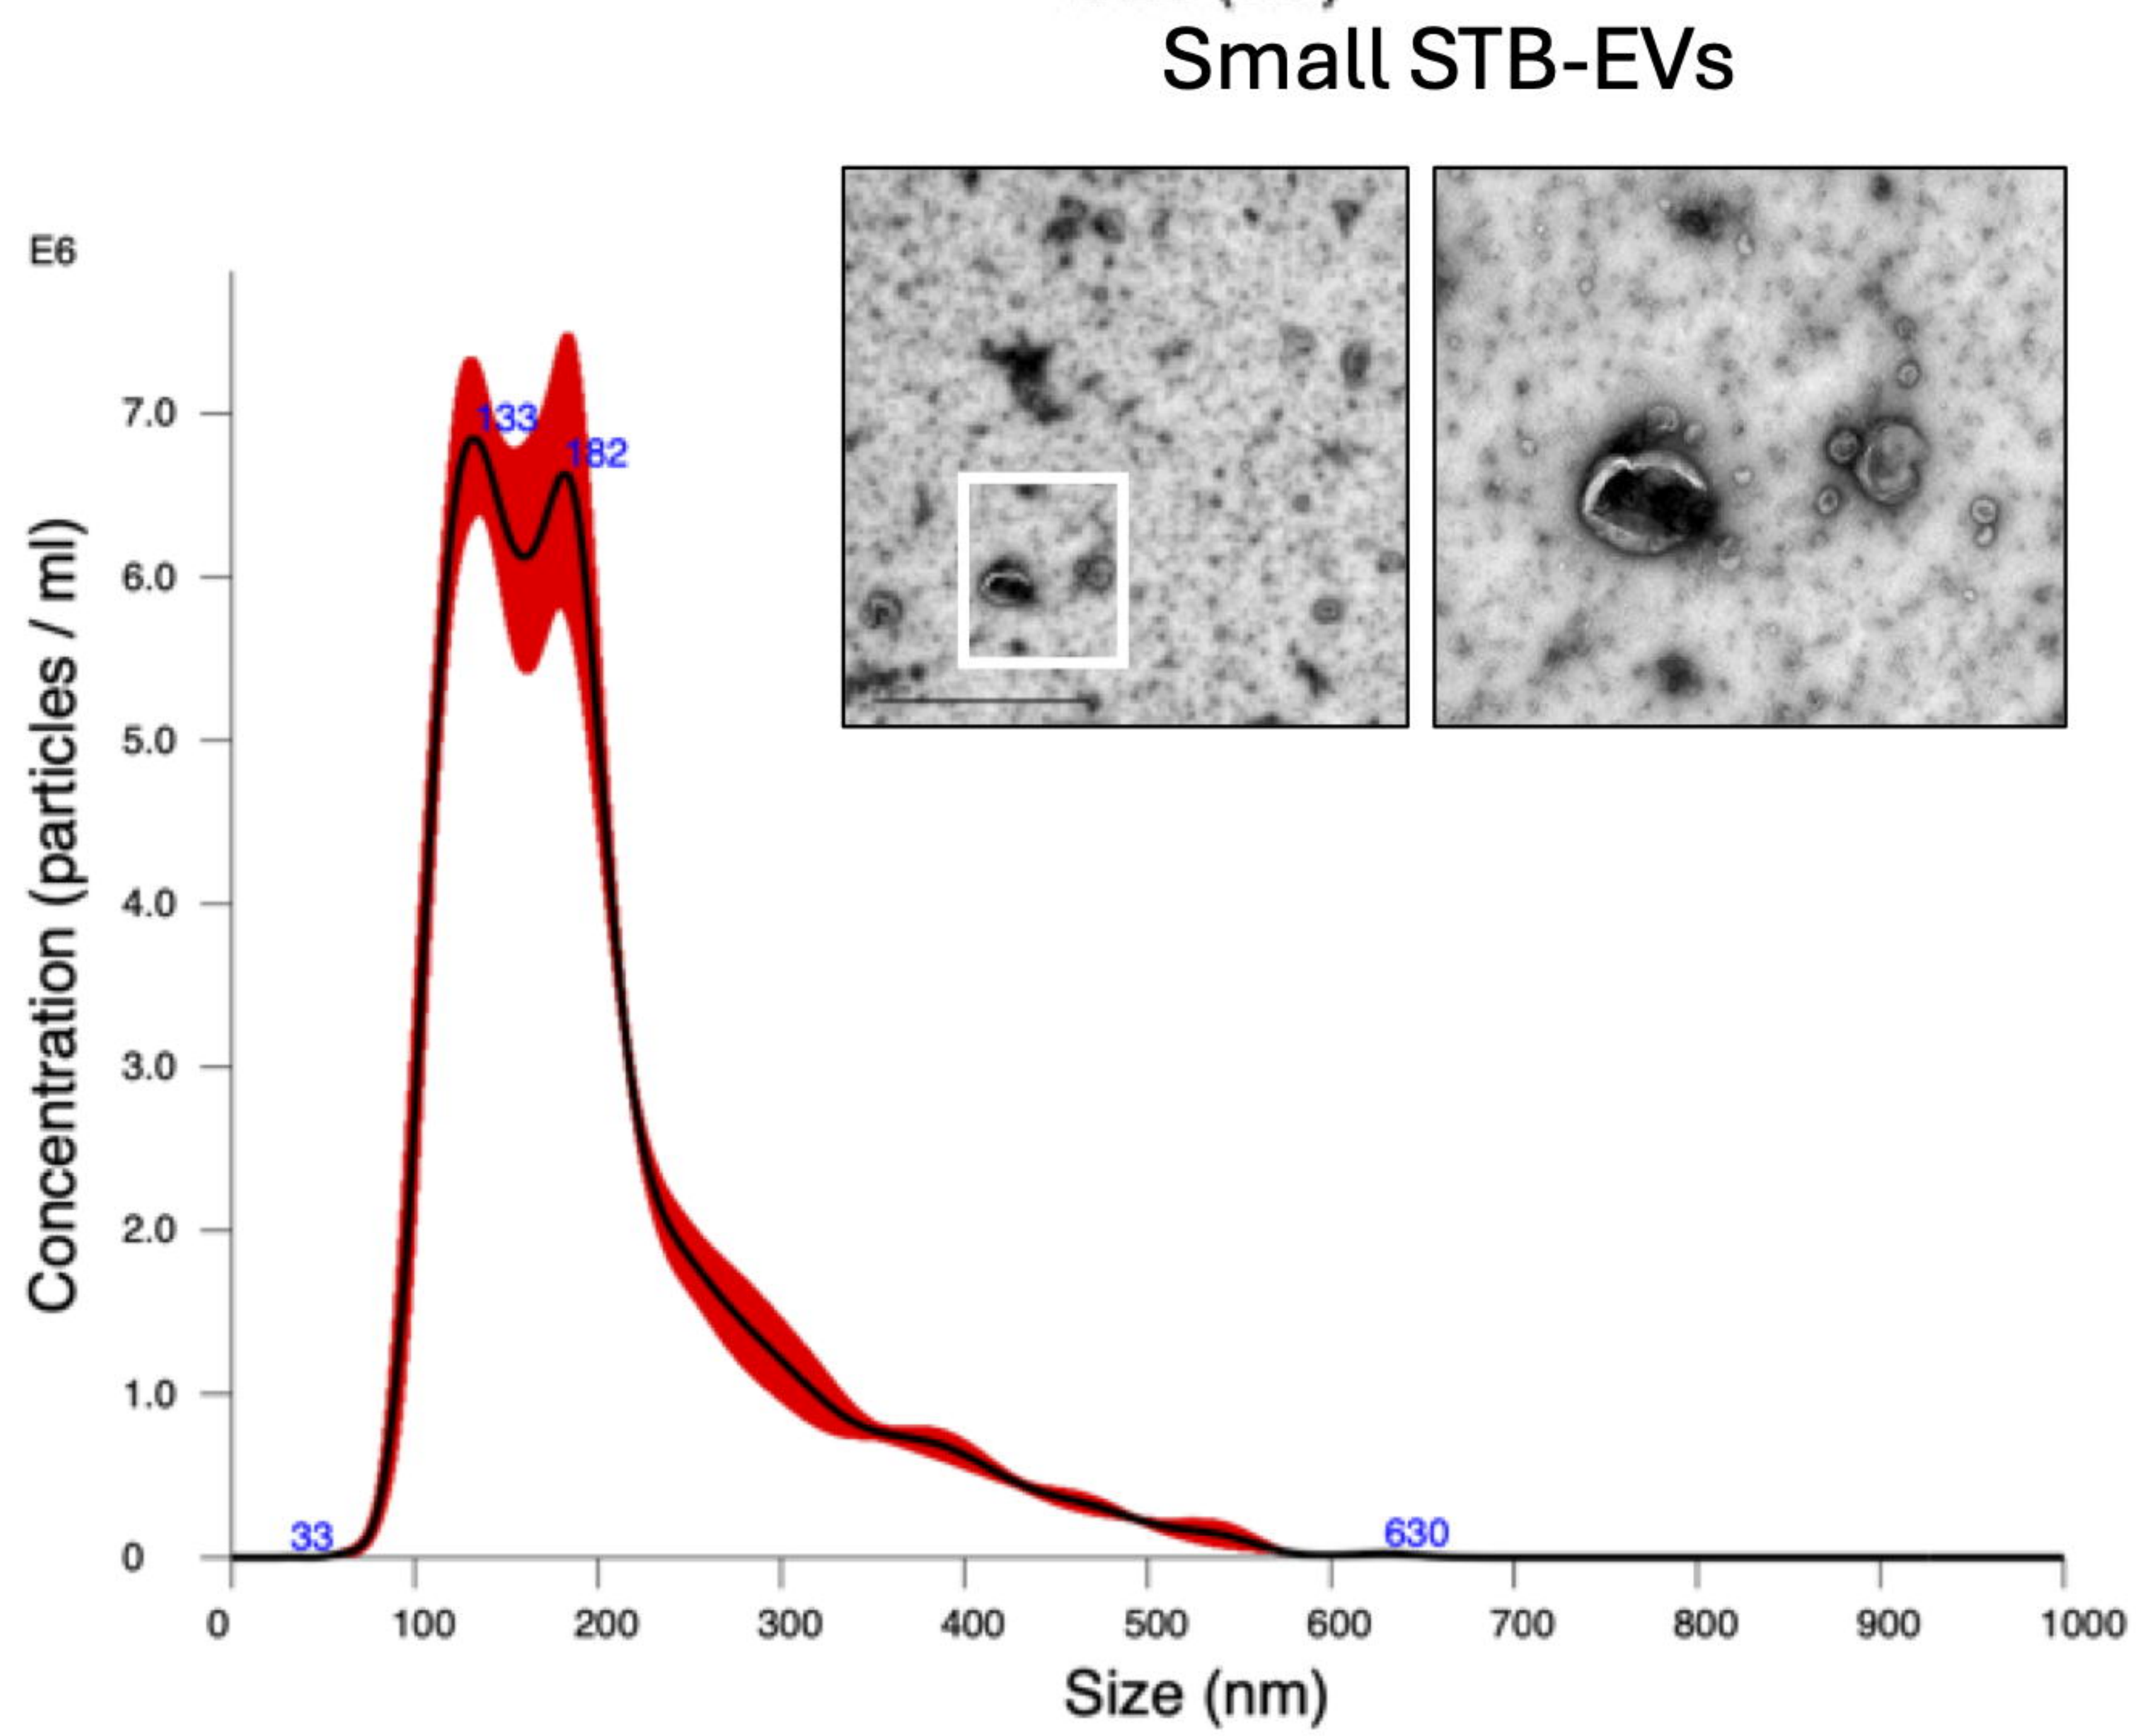

**C**

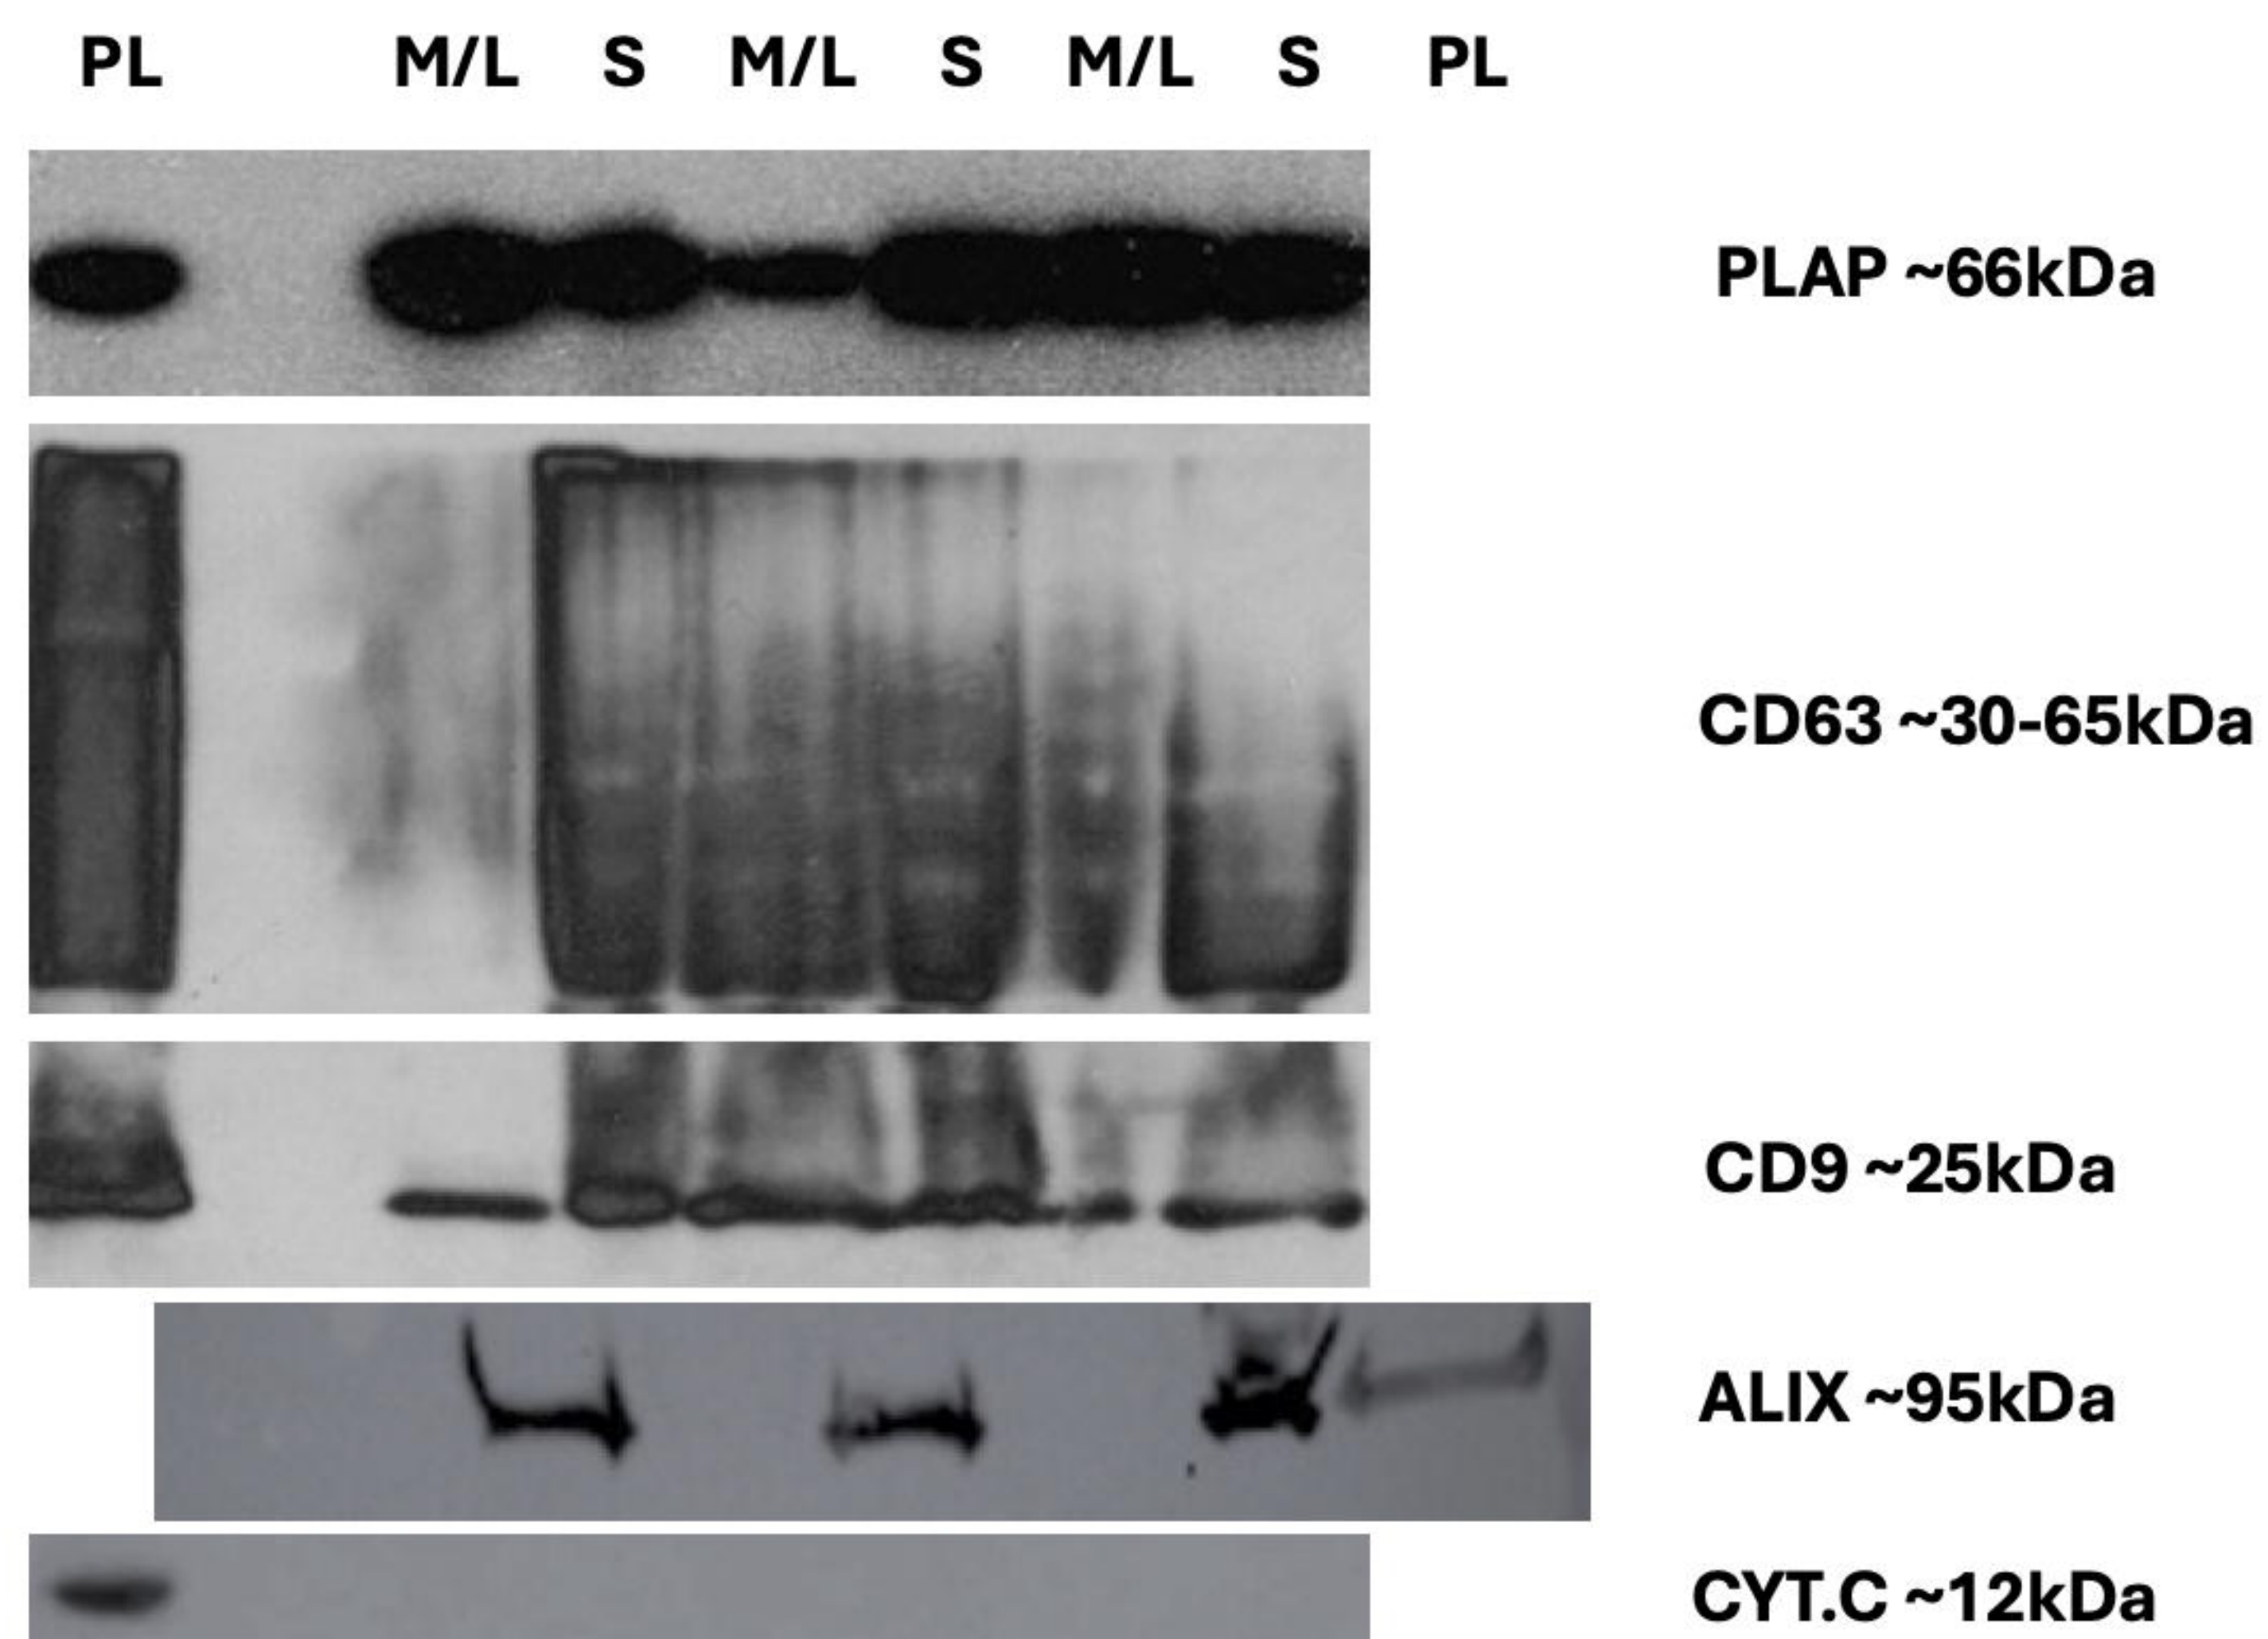



**A**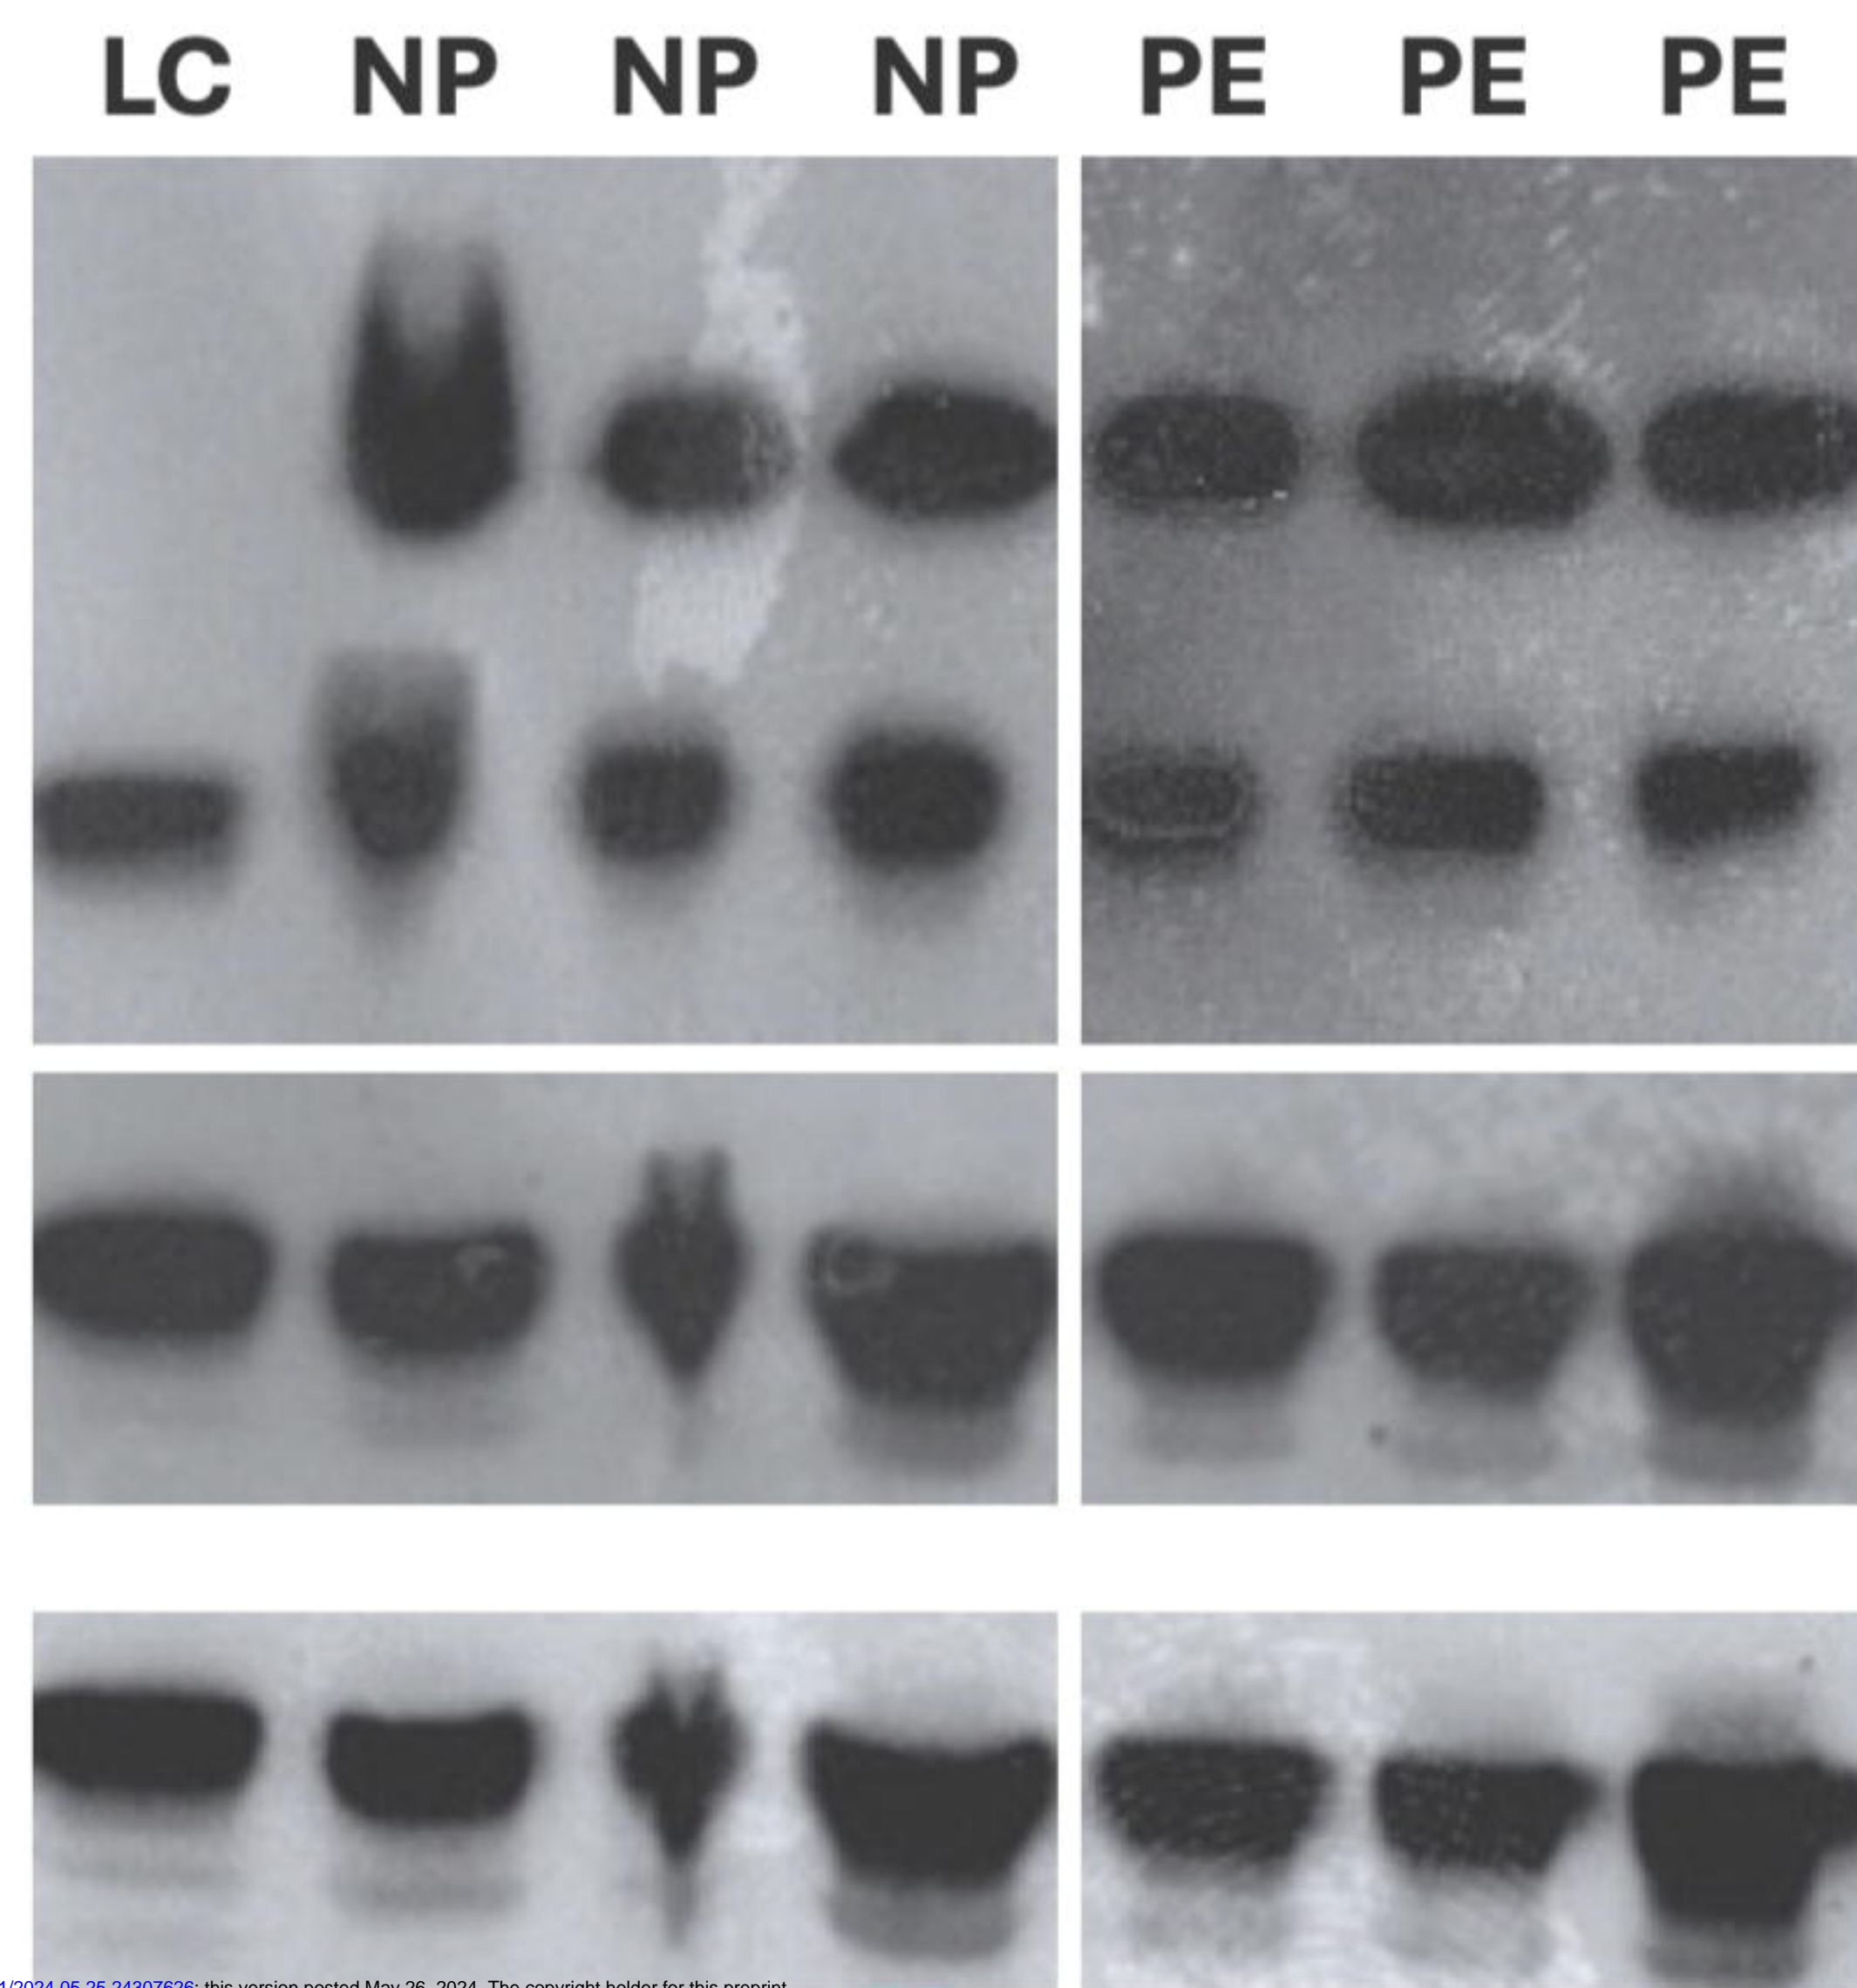

medRxiv preprint doi: <https://doi.org/10.1101/2024.05.20.24267820>; this version posted May 20, 2024. The copyright holder for this preprint (which was not certified by peer review) is the author/funder, who has granted medRxiv a license to display the preprint in perpetuity. It is made available under a CC-BY-NC-ND 4.0 International license.

**B**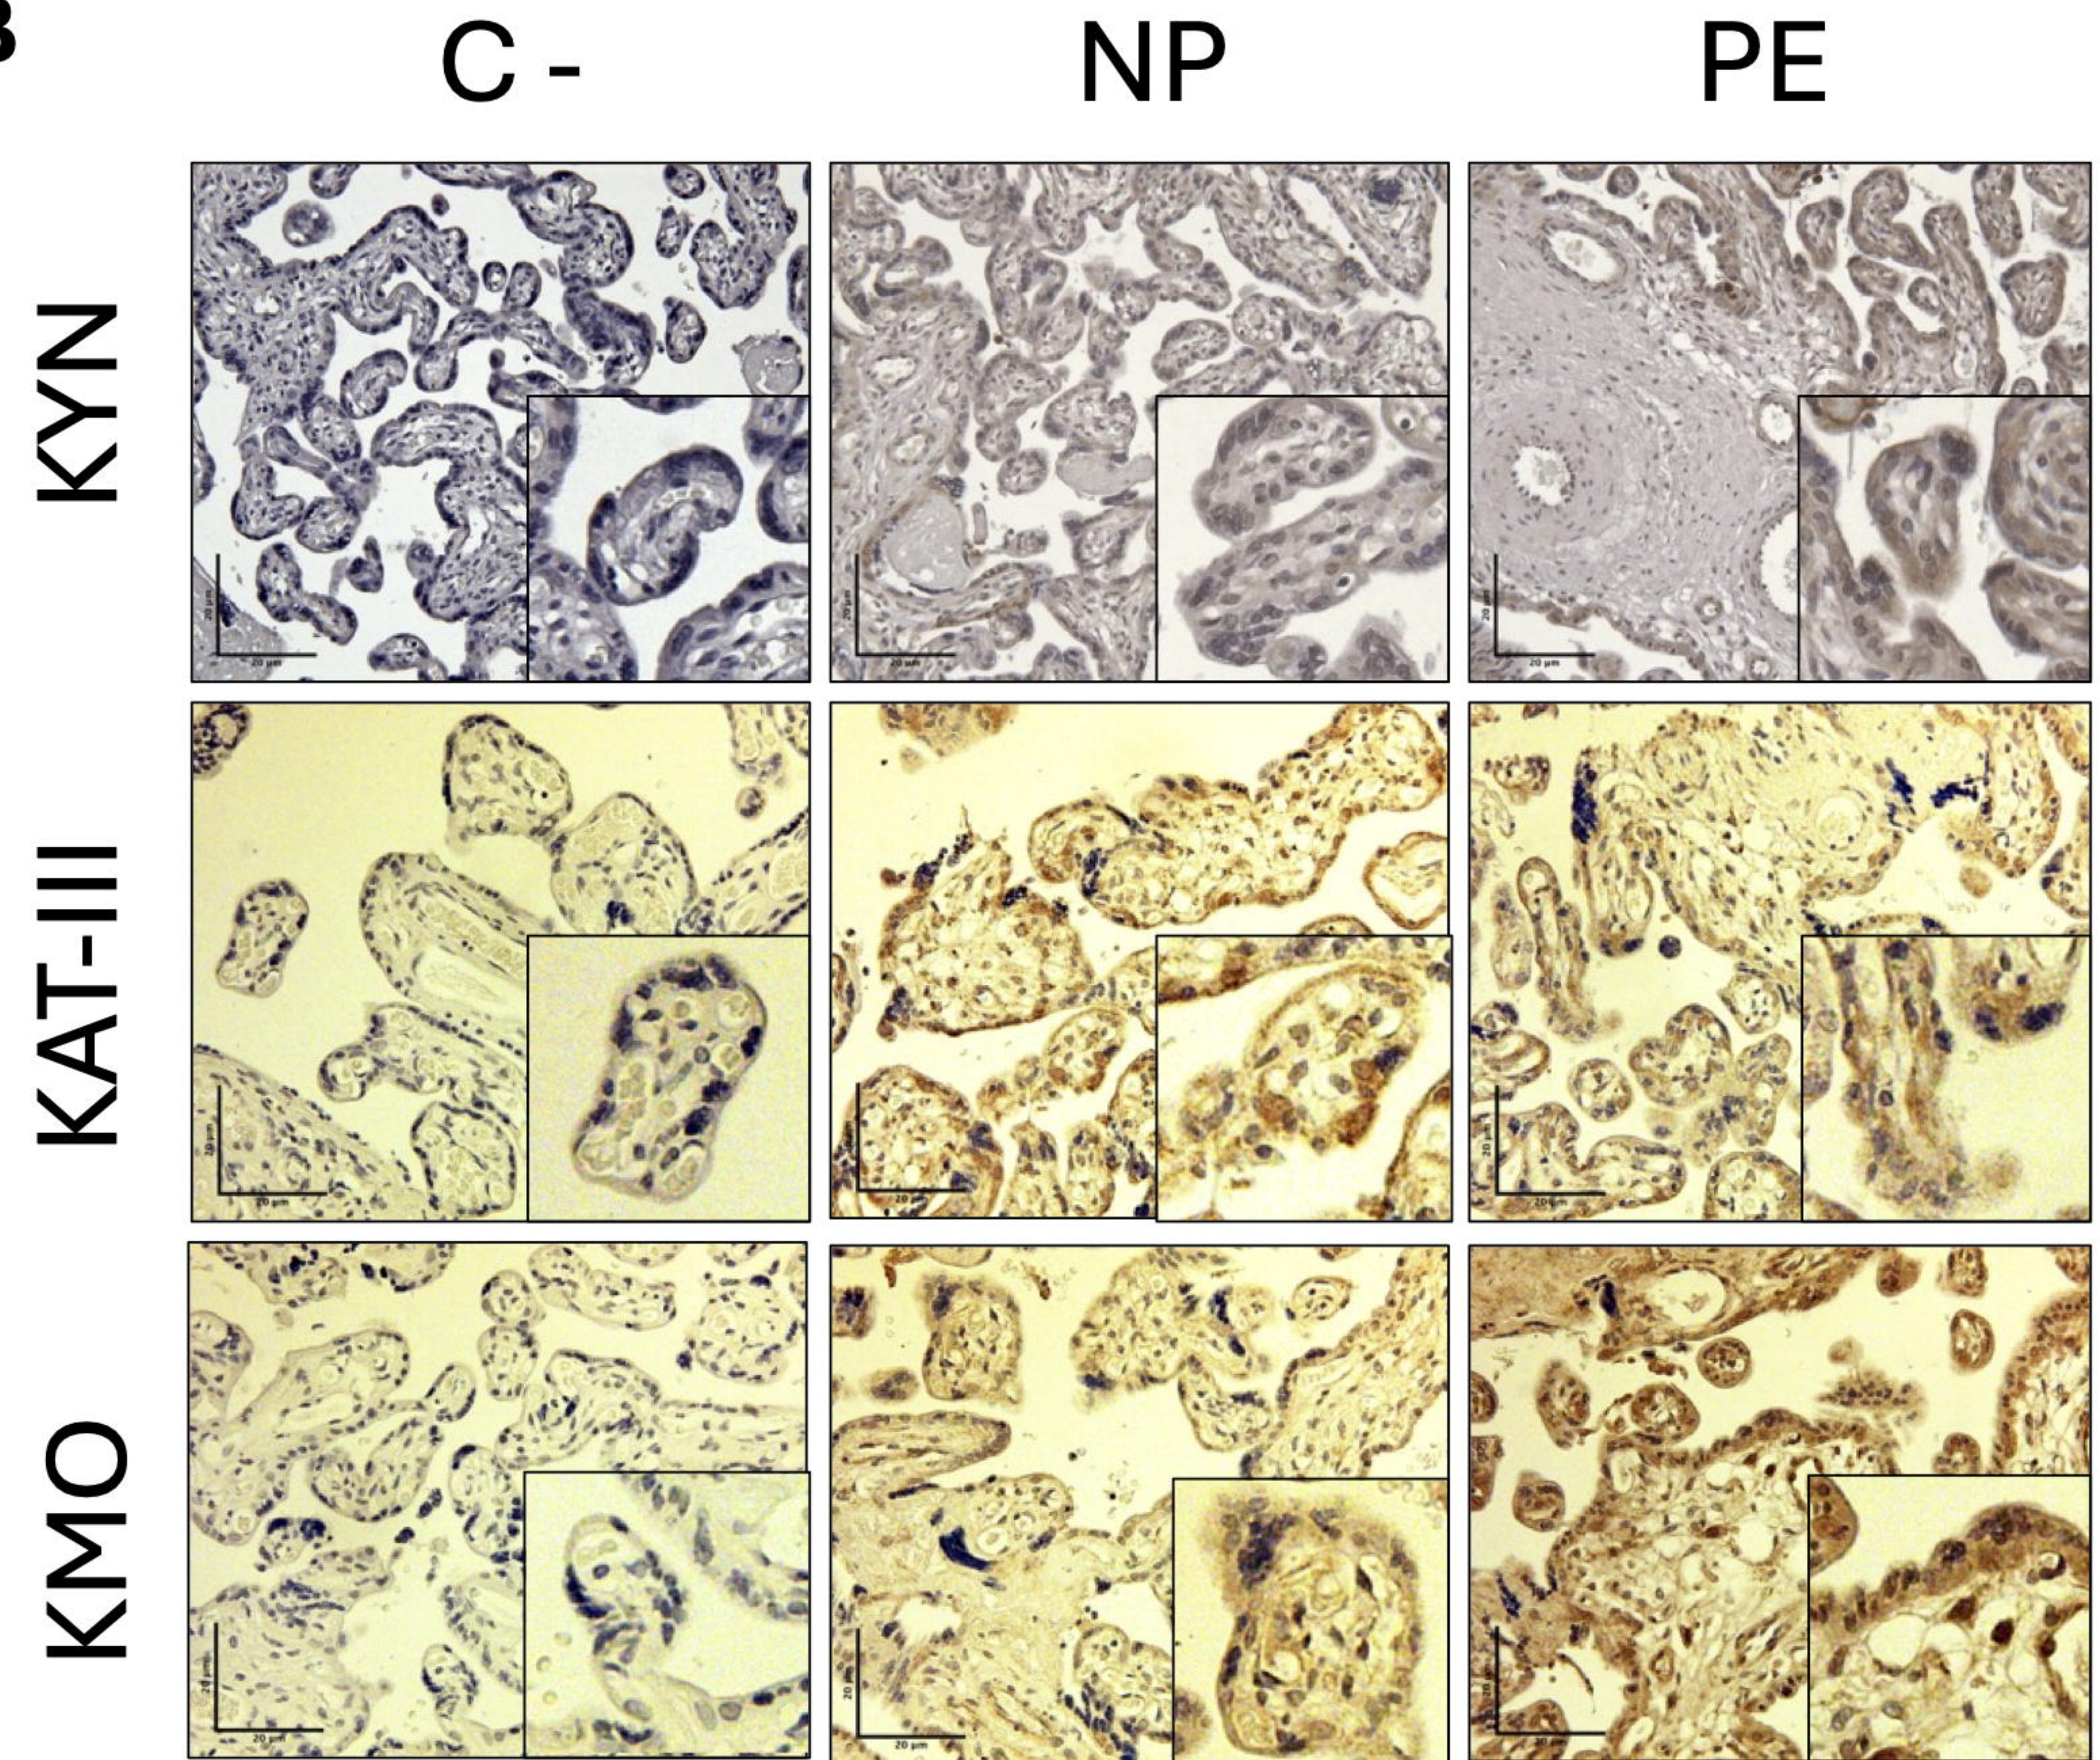

**A**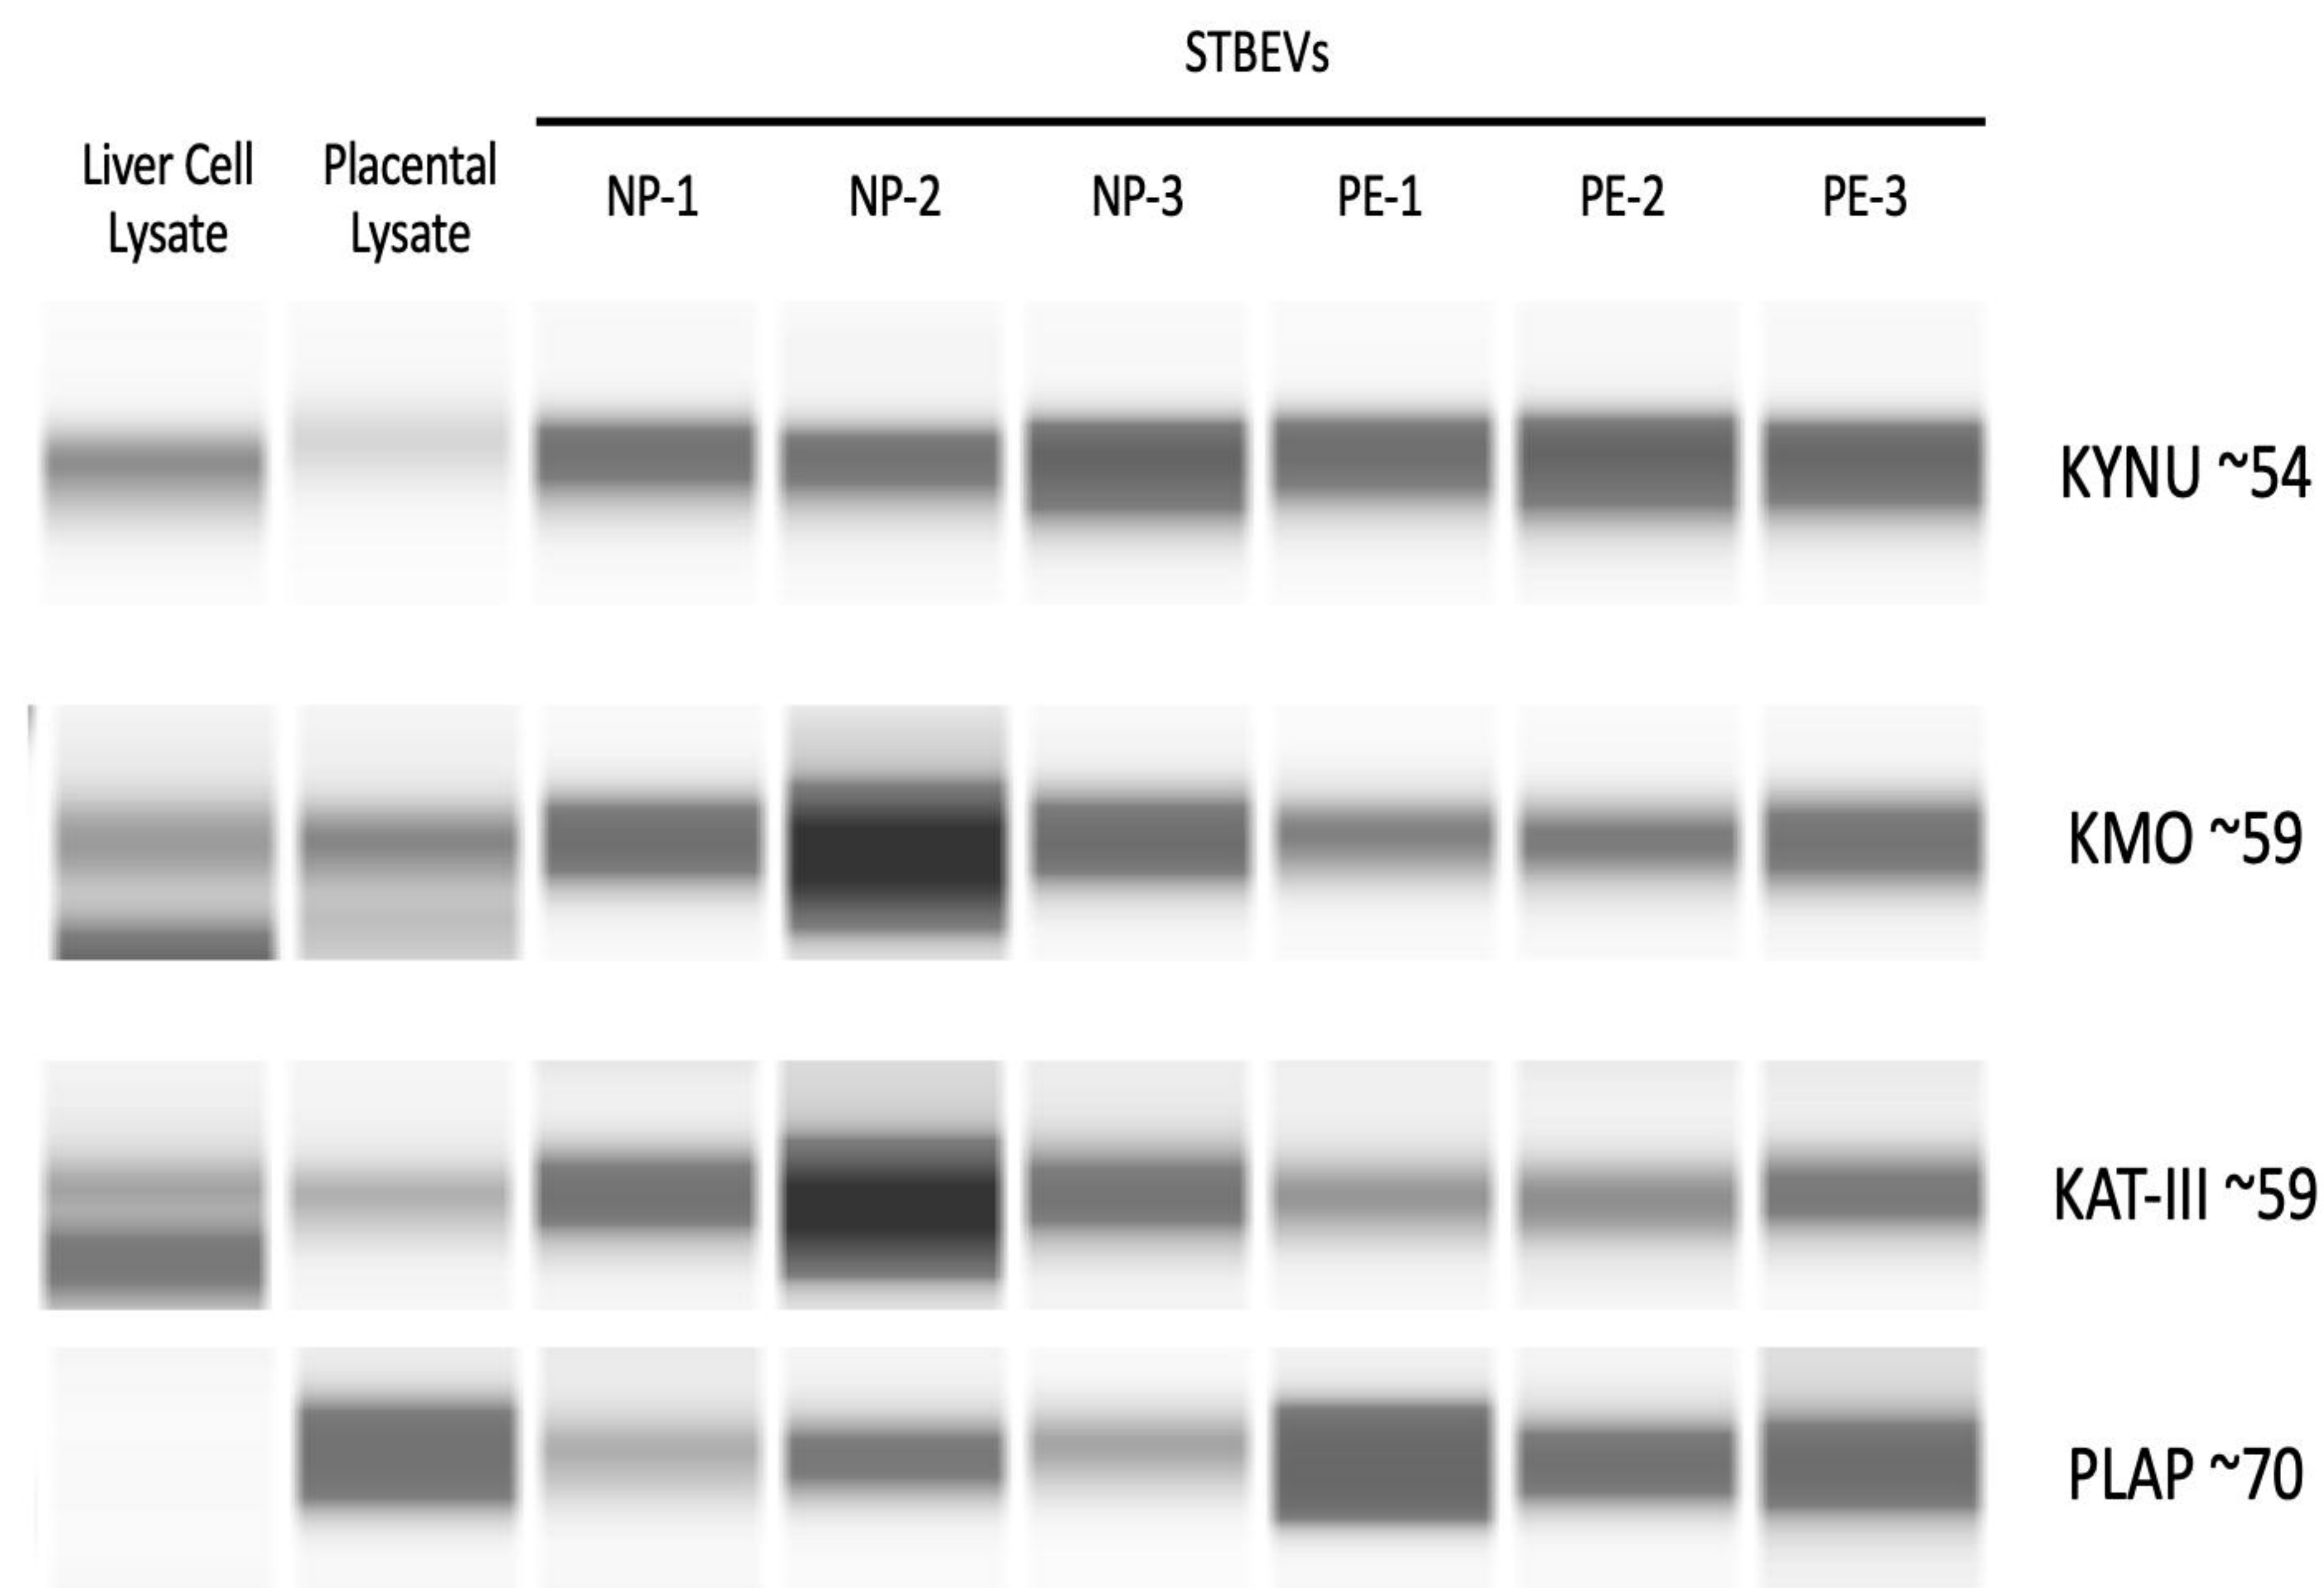**B**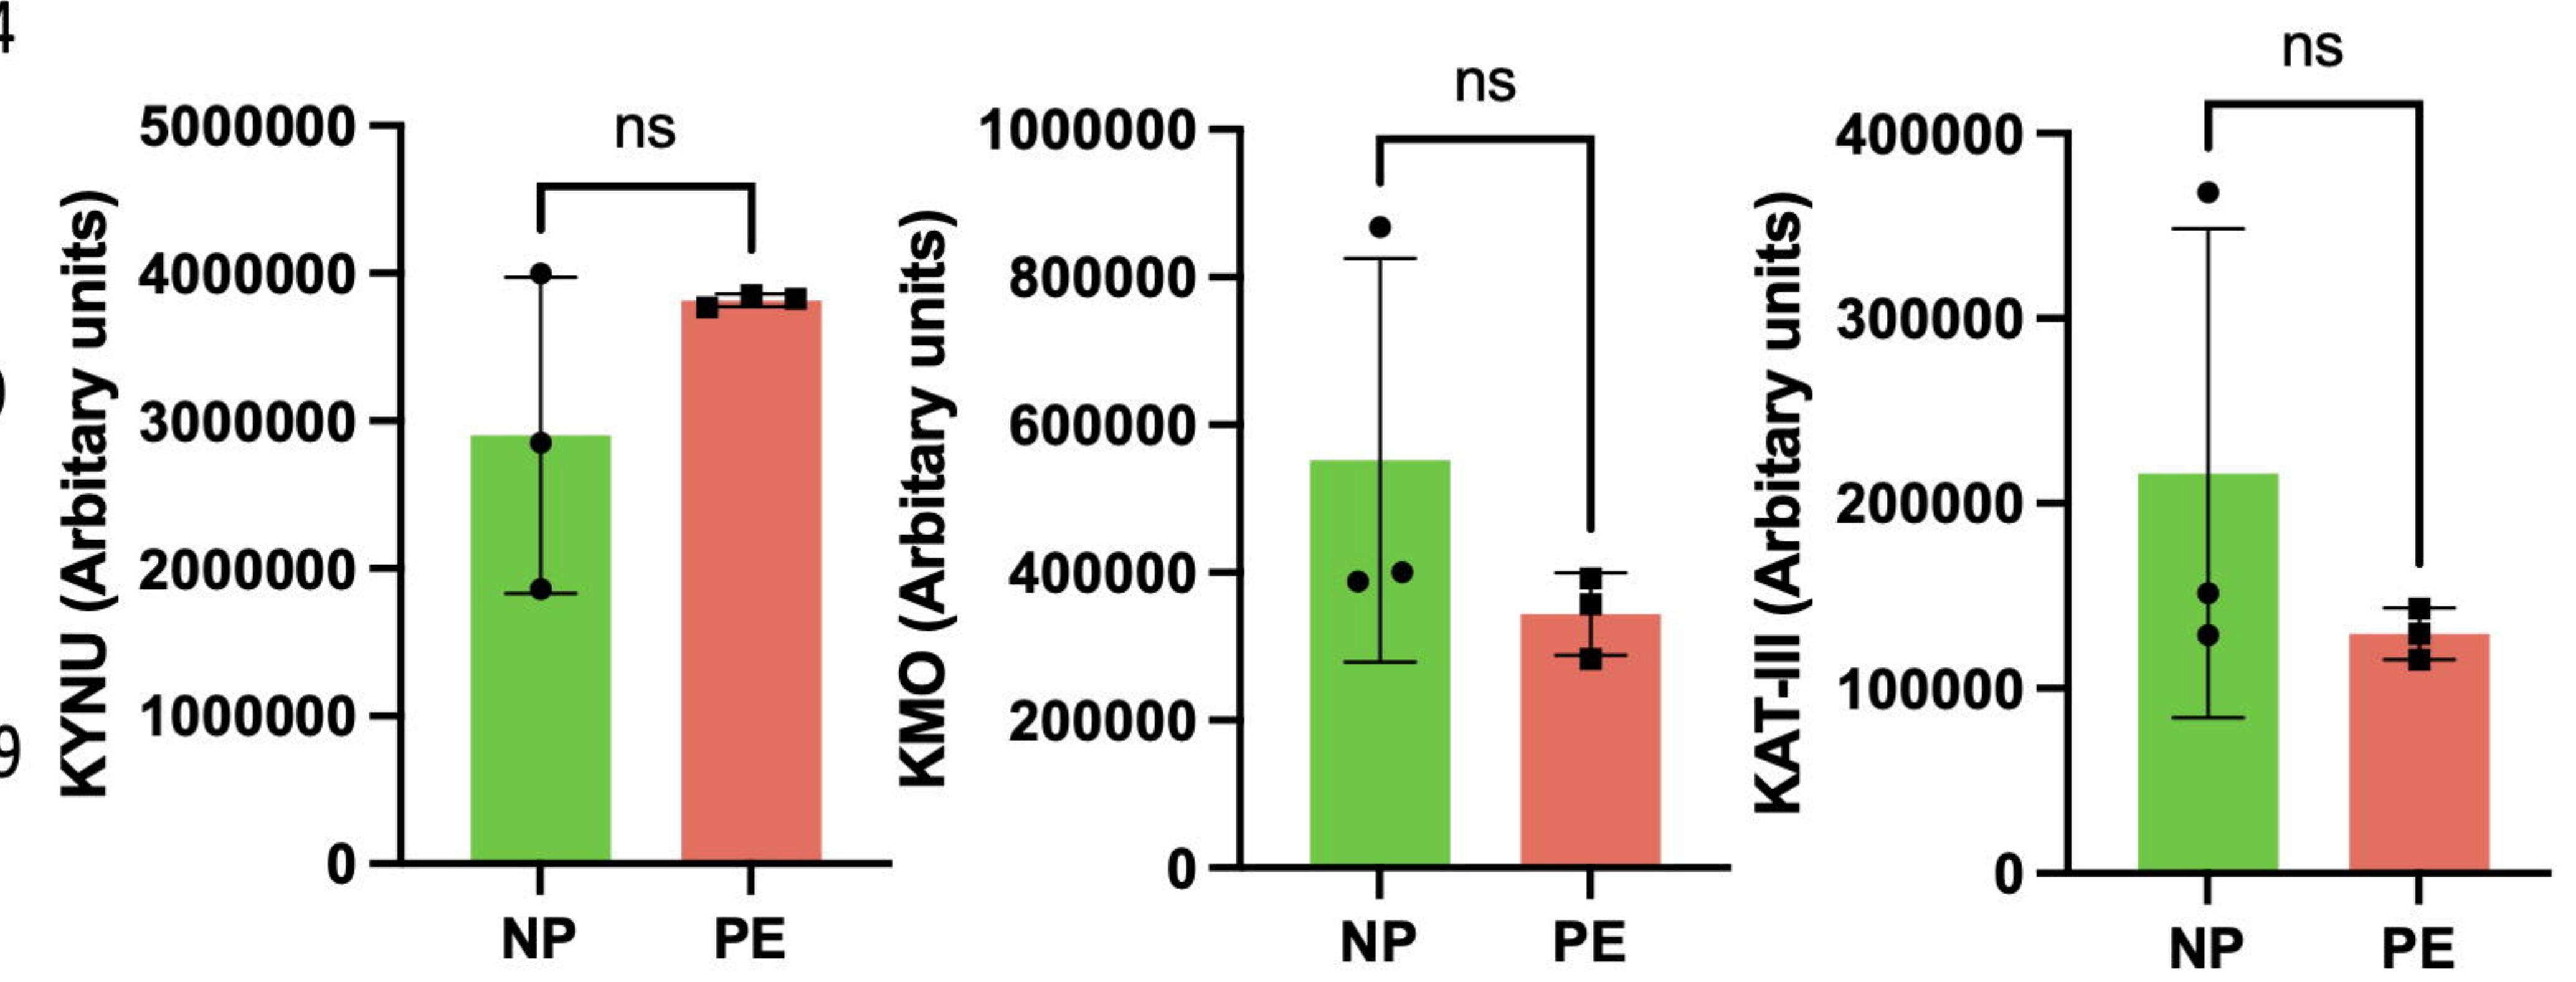

**A** 5 minutes

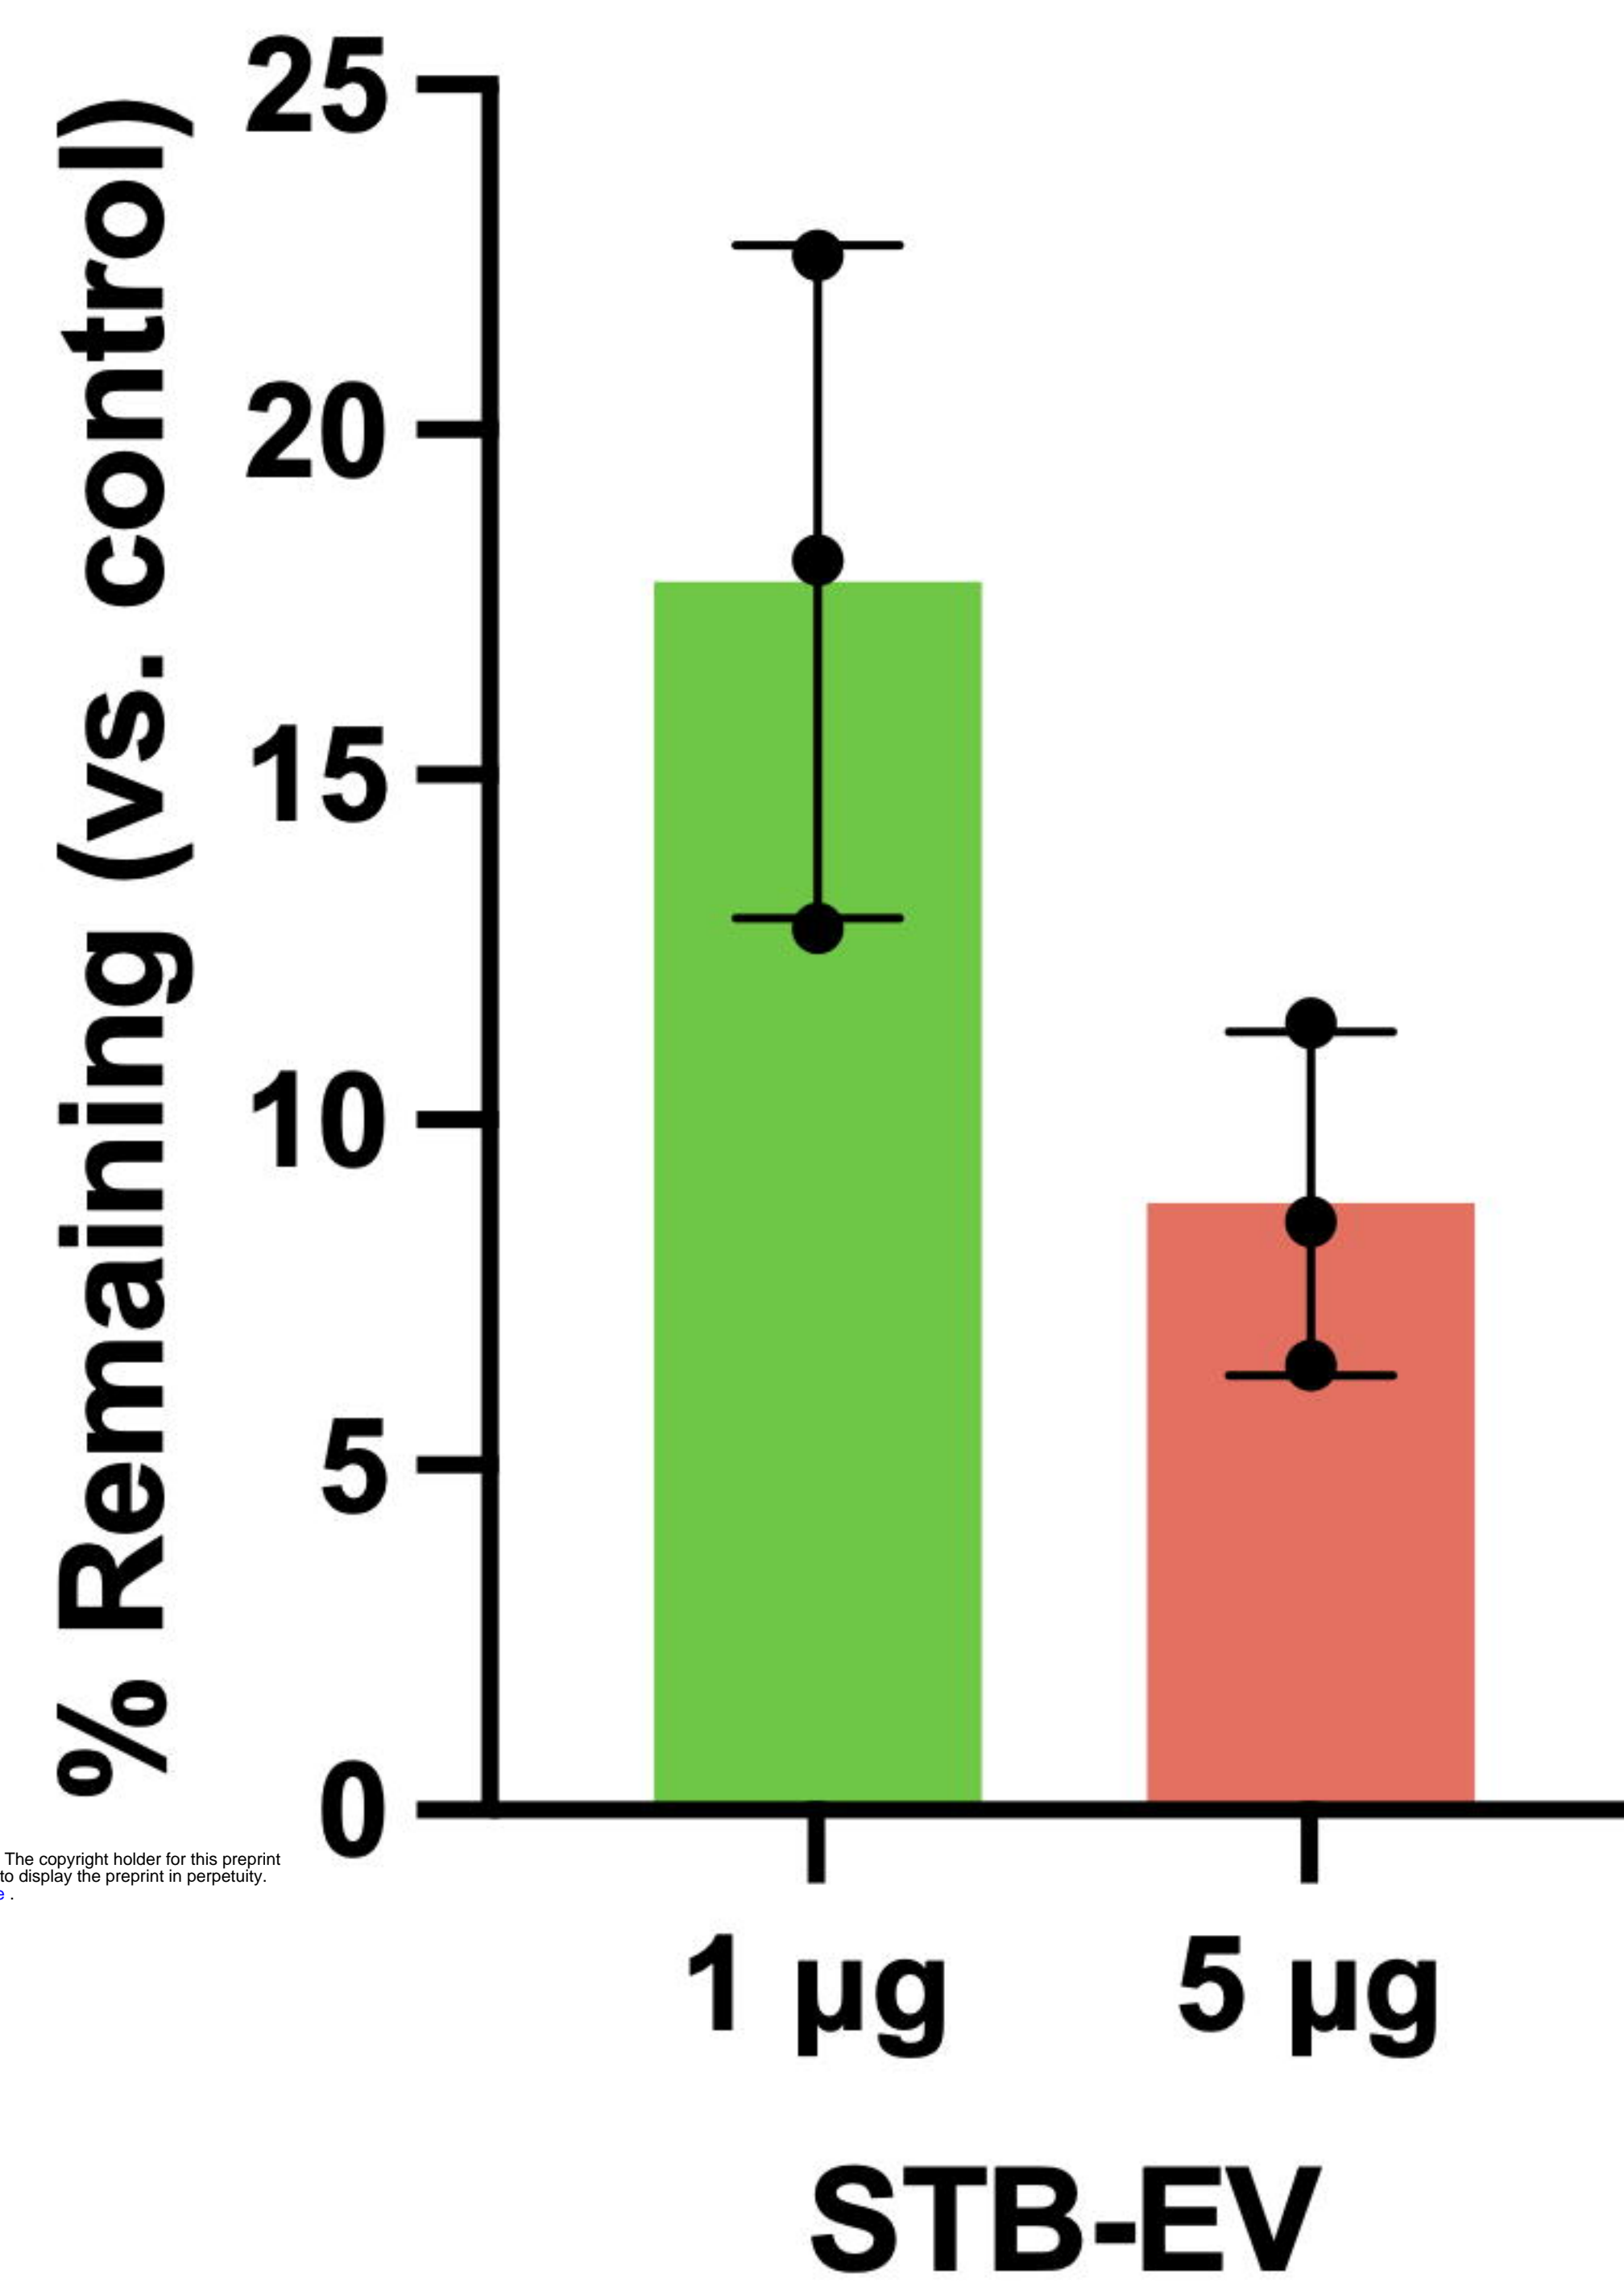

**B** 5 minutes

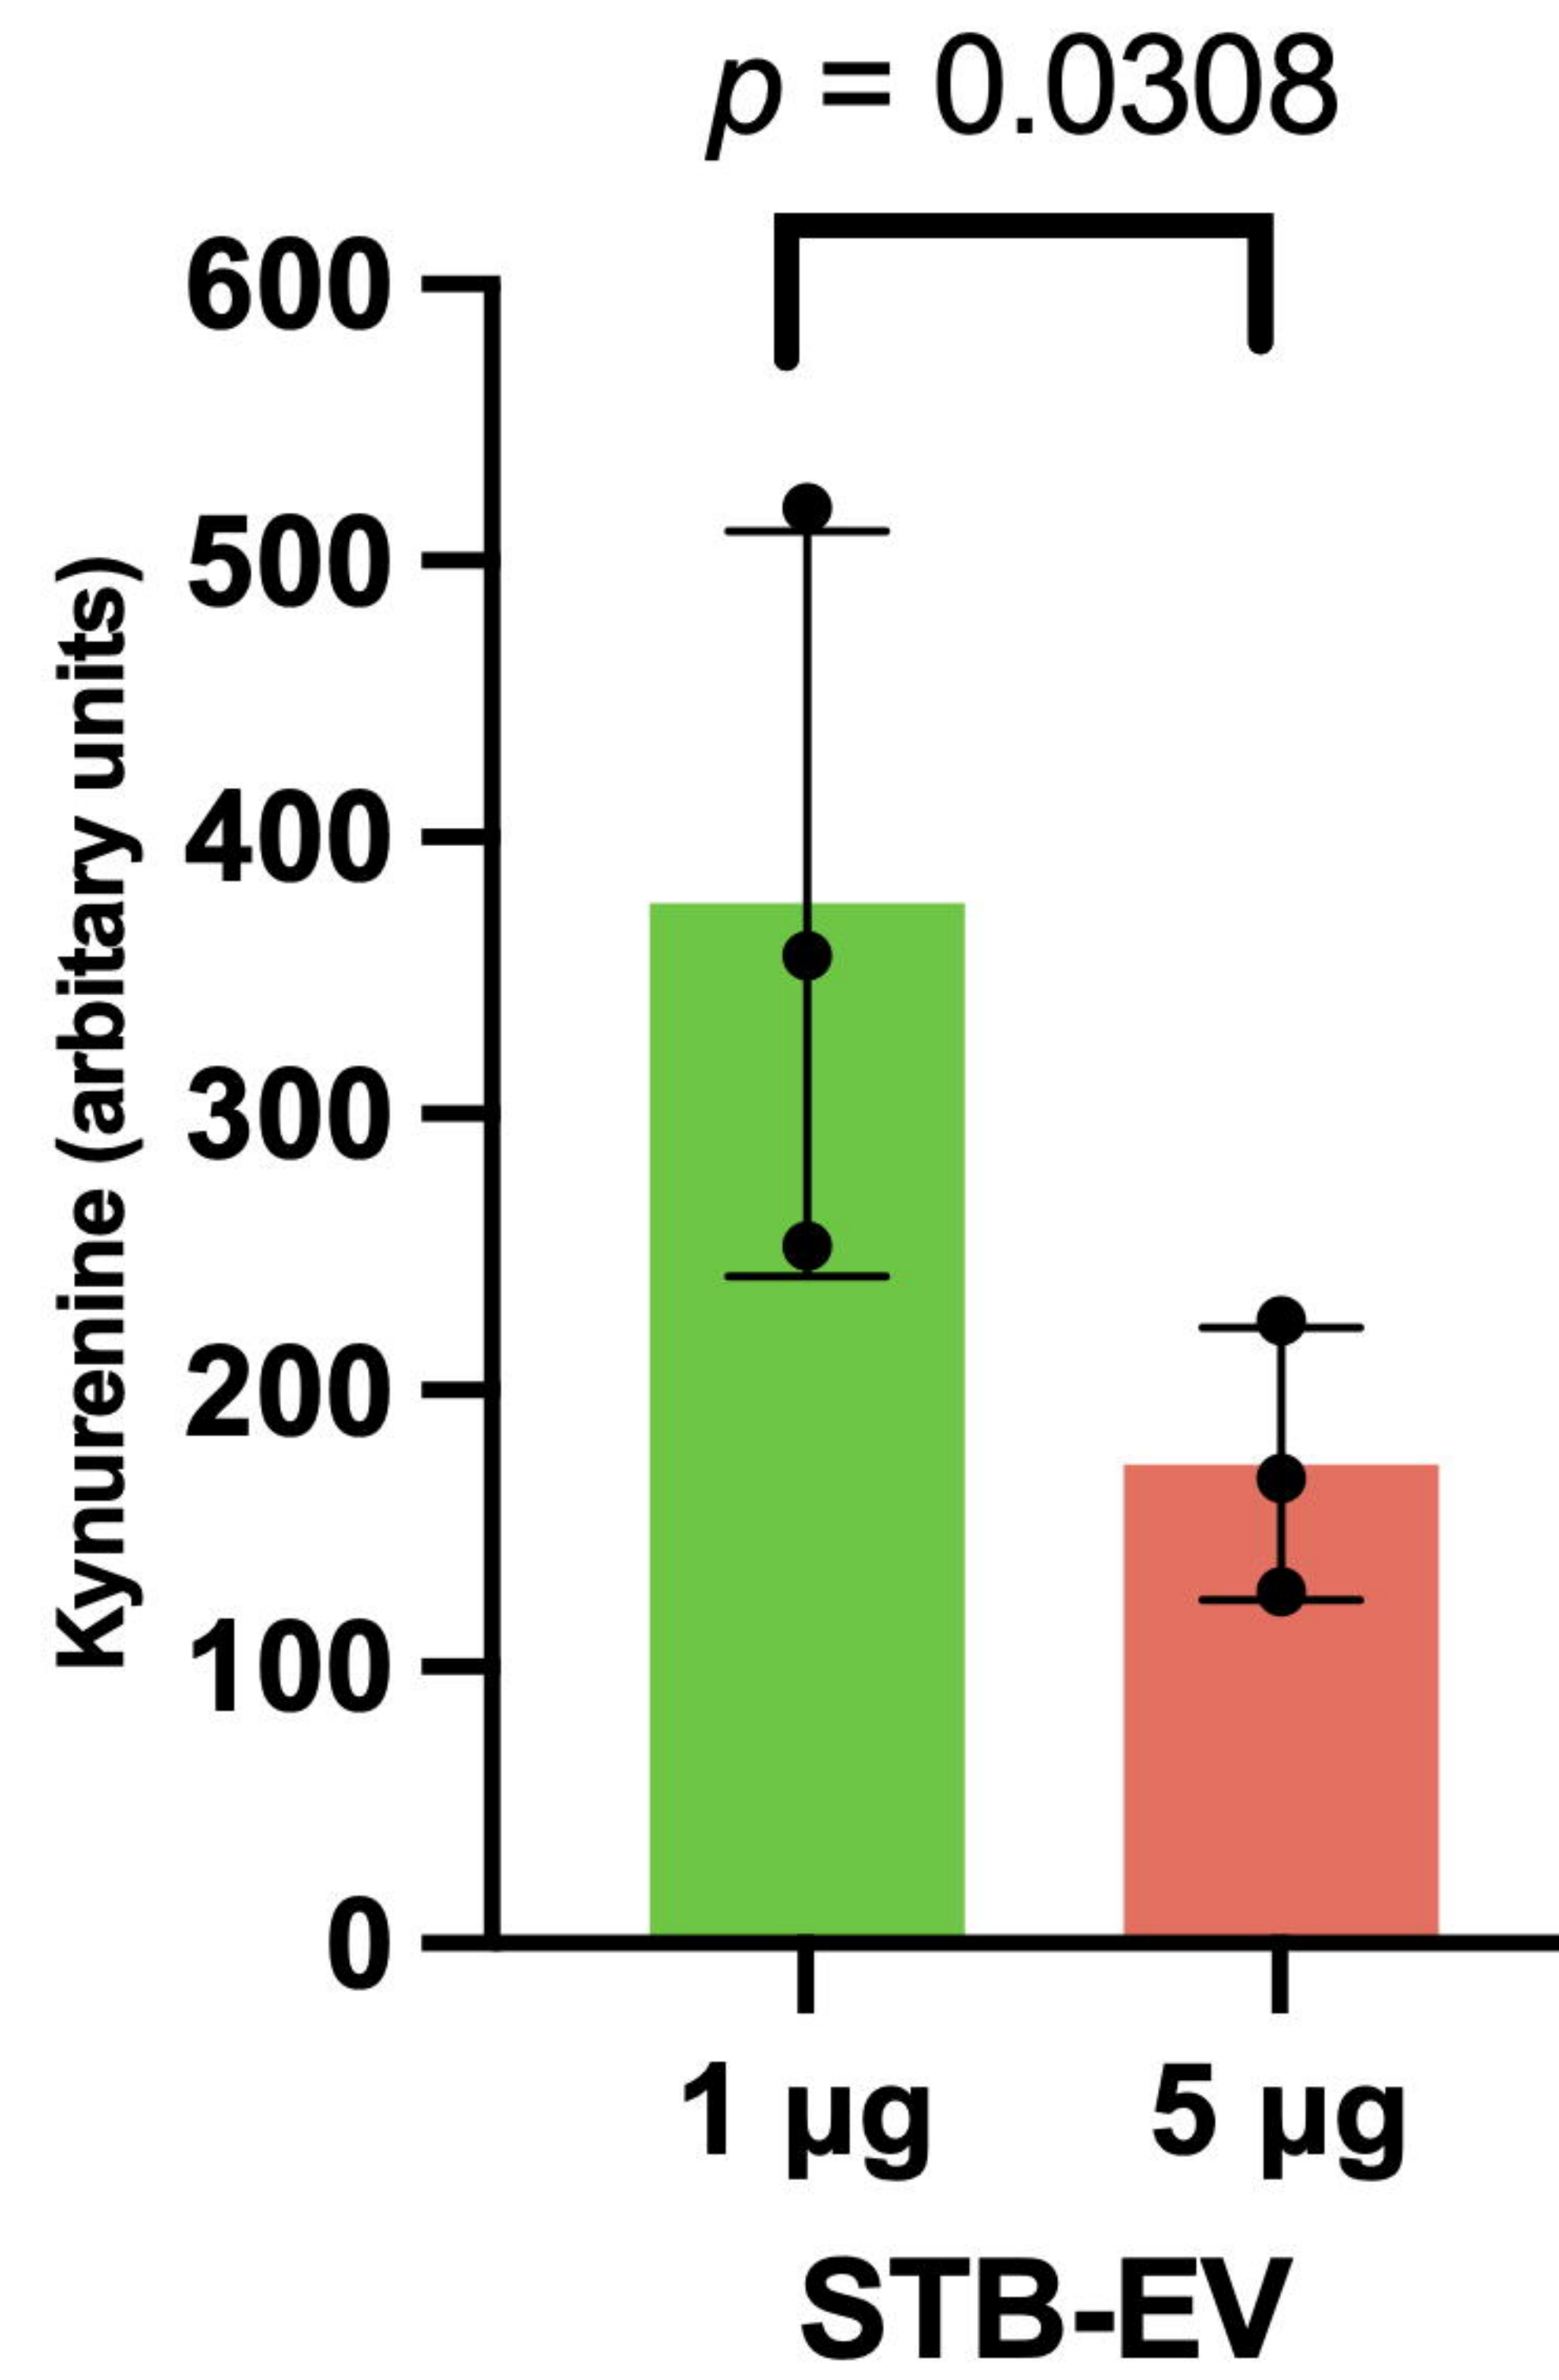

**C** 60 minutes

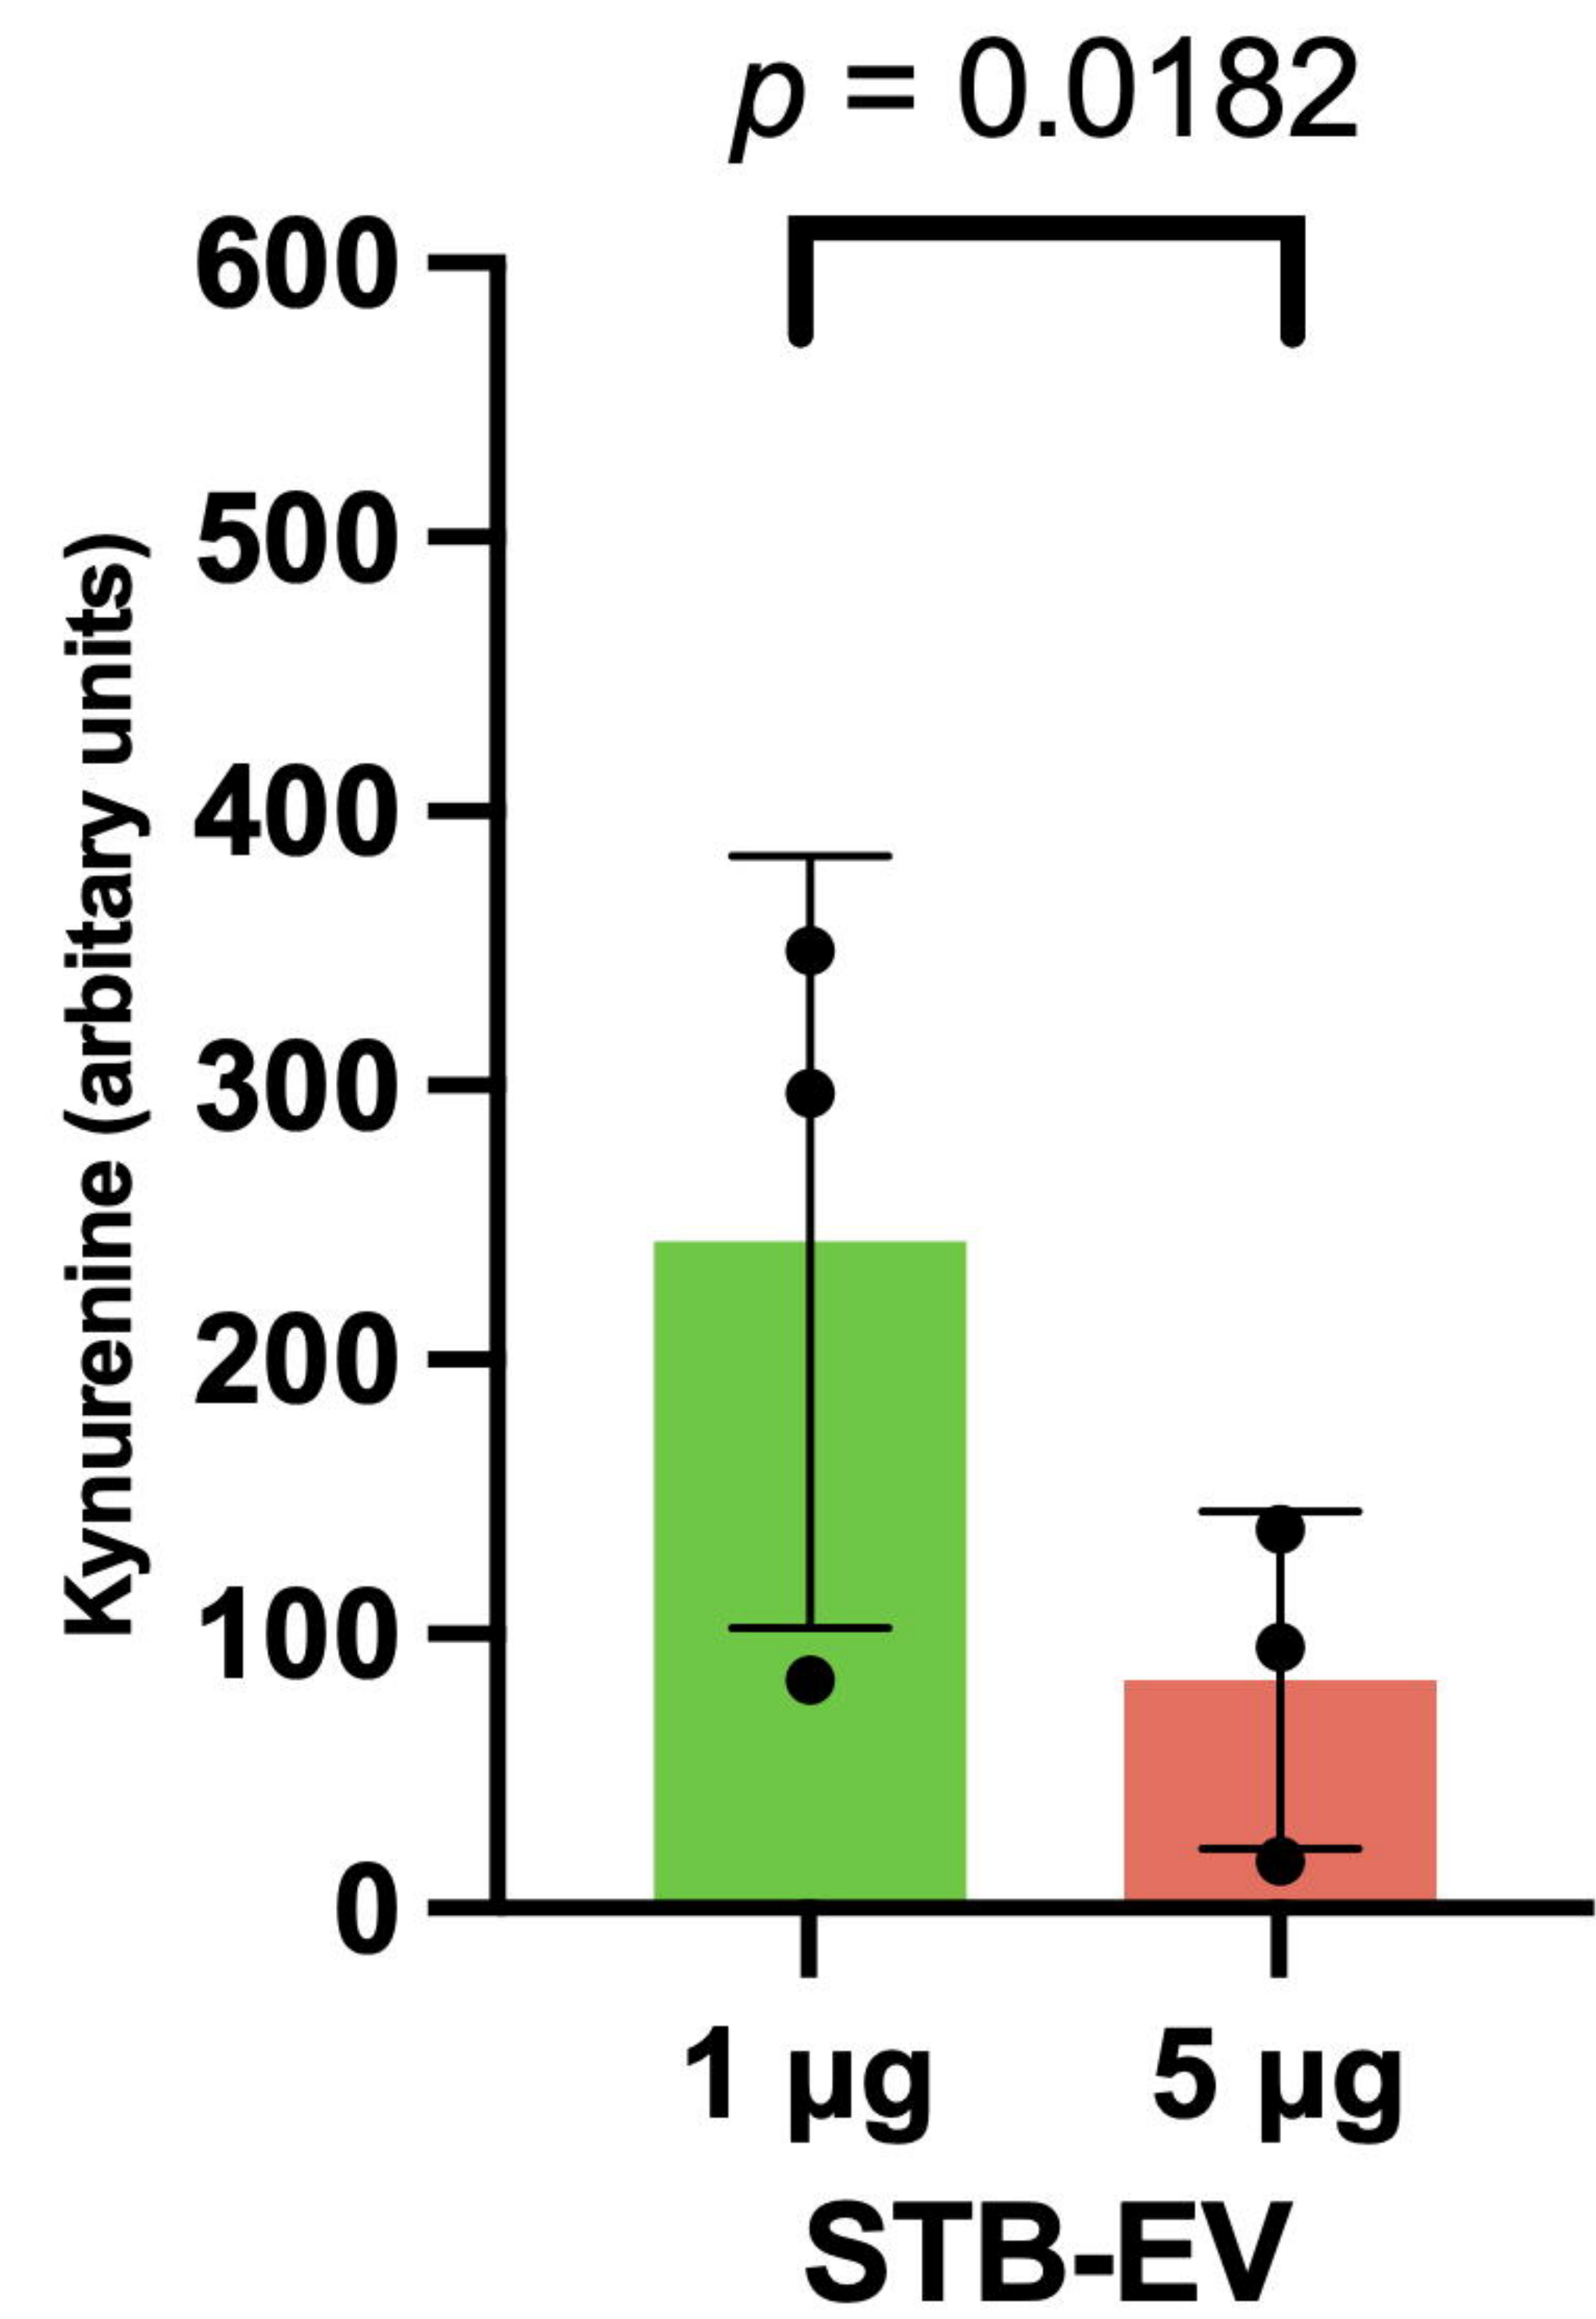

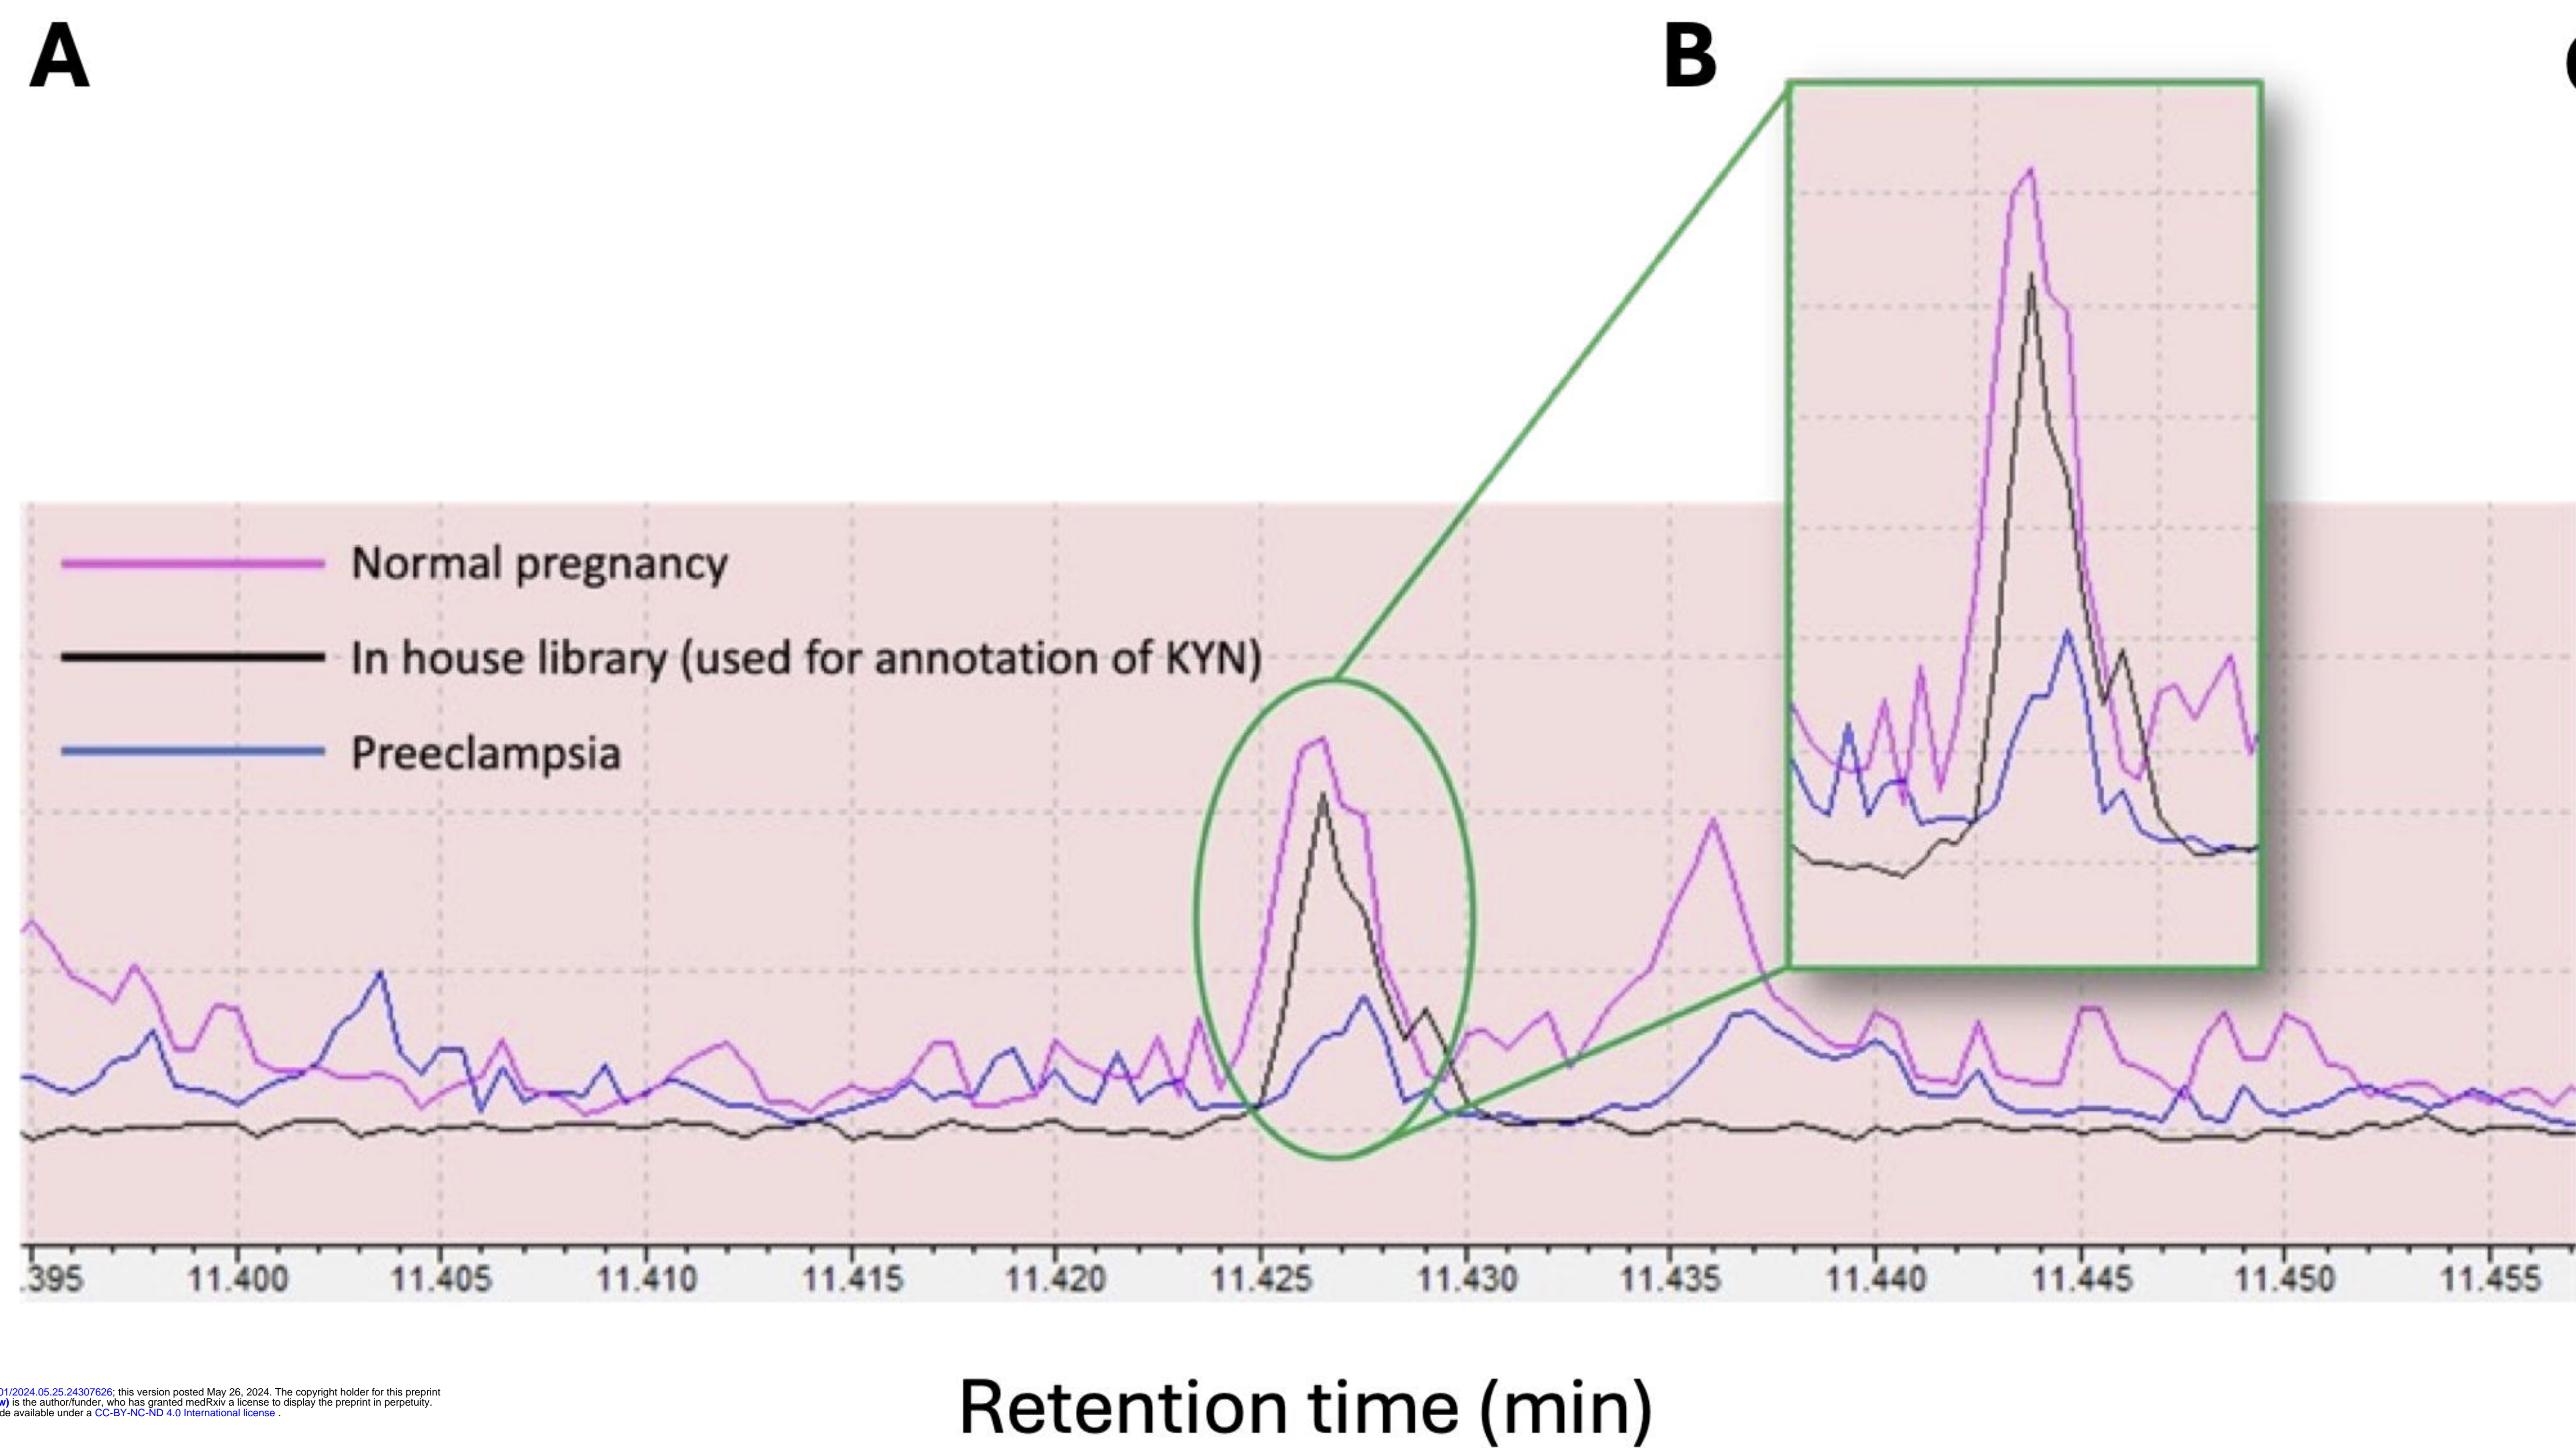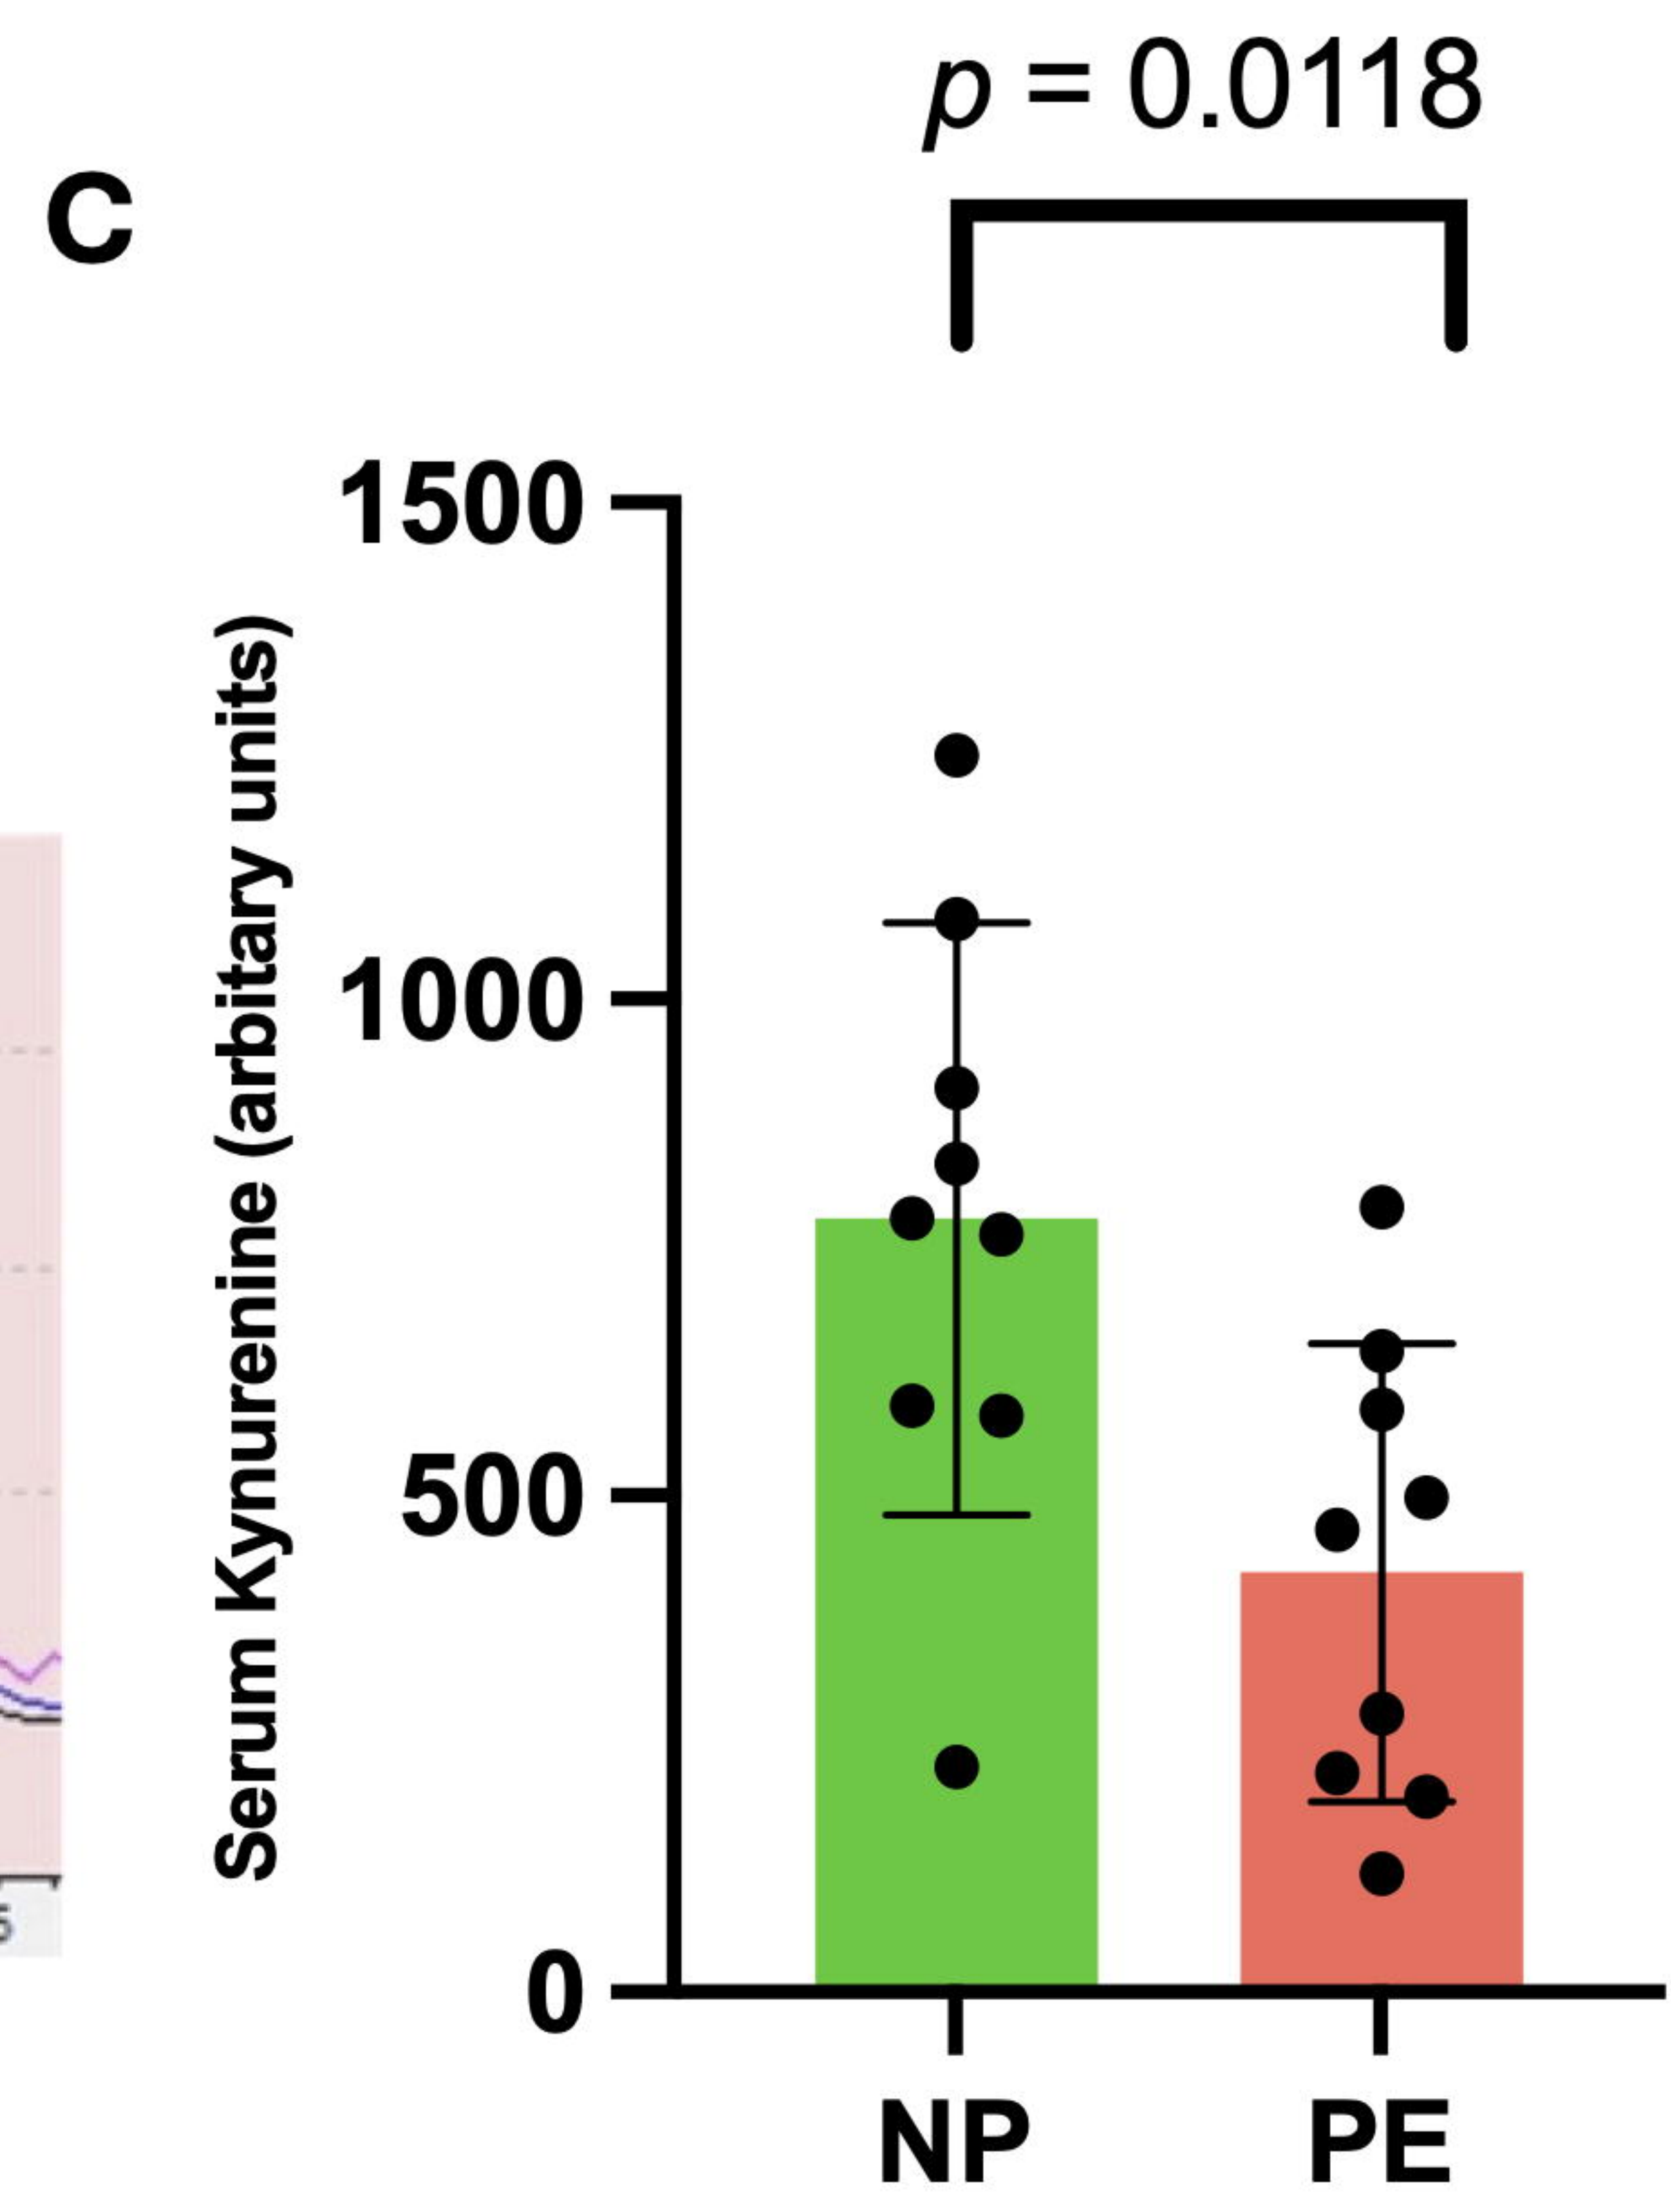

medRxiv preprint doi: <https://doi.org/10.1101/2024.05.20.24267626>; this version posted May 20, 2024. The copyright holder for this preprint (which was not certified by peer review) is the author/funder, who has granted medRxiv a license to display the preprint in perpetuity. It is made available under a CC-BY-NC-ND 4.0 International license.

**Table 1. Clinical characteristics of studied women.**

|                               | <b>NP (n=9)</b> | <b>EOPE (n=9)</b> | <b>P value</b> |
|-------------------------------|-----------------|-------------------|----------------|
| Age (years)                   | 28.6 ± 4.2      | 30.4 ± 4.1        | > 0.05         |
| Gestational age (weeks)       | 28.3 ± 2.9      | 28.0 ± 2.7        | > 0.05         |
| SBP (mmHg)                    | 111.3 ± 7.5     | 156.3 ± 14.6      | < 0.0001       |
| DBP (mmHg)                    | 67.3 ± 6.1      | 100.8 ± 6.6       | < 0.0001       |
| BMI (kg/m <sup>2</sup> )      | 24.2 ± 4.0      | 29.1 ± 7.6        | > 0.05         |
| Birth weight (g)              | 3801 ± 666.3    | 1815 ± 527.5      | < 0.0001       |
| Gestation at delivery (weeks) | 39.0 ± 1.3      | 32.3 ± 2.7        | < 0.0001       |
| sFlt-1:PlGF                   | 1.0 ± 0.2       | 599.3 ± 569.5     | < 0.05         |

Note: Values are presented mean ± SD. SBP, systolic blood pressure. DPB, diastolic blood pressure. BMI, body mass index (kg/m<sup>2</sup>).
